# Supplementary material for: Determination of the amino linkage of the d -Dab residue of the cyclic lipo-octapeptide occidiofungins A–D and the antifungal activity of their analogues
Source: Royal Society of Chemistry journal article supplement (doi:10.1039/d4ob00900b), 2024-01-01

## Supporting information

Determination of the amino linkage of D-Dab residue of occidiofungins A-D cyclic lipopeptides and antifungal activity of their analogues

Rin Kainuma, Shigekazu Yano, Hiroyuki Konno\*

Department of Chemistry and Biological Engineering, Graduate School of Science and Engineering, Yamagata University, Yonezawa, Yamagata 992-8510, Japan

\*Corresponding author should be addressed

Phone and Fax: +81-238-26-3131.

E-mail: konno@yz.yamagata-u.ac.jp

Keywords: occidiofungin, burkholdine, NMR analysis, 2,4-diamino butyric acid, potent antifungal activity

**Table S1.** <sup>1</sup>H-NMR assignments of the tripeptides (**11a-b**, **12a-b**)

|                    | Tyr- $\alpha$ Dab-Gly ( <b>11a</b> ) | D-Tyr- $\alpha$ Dab-Gly ( <b>11b</b> ) | Tyr- $\gamma$ Dab-Gly ( <b>12a</b> ) | D-Tyr- $\gamma$ Dab-Gly ( <b>12b</b> ) |
|--------------------|--------------------------------------|----------------------------------------|--------------------------------------|----------------------------------------|
| TyrNH <sub>2</sub> | 8.09, d, <i>J</i> 3.4                | 8.09, d, <i>J</i> 3.4                  | 8.25, d, <i>J</i> 4.5                | 8.25, d, <i>J</i> 4.5                  |
| 2                  | 3.94, m                              | 3.96, m                                | 3.80, m                              | 3.81, m                                |
| 3                  | 2.92, dd, <i>J</i> 14.3, 5.7         | 2.94, dd, <i>J</i> 13.7, 5.7           | 2.92, dd, <i>J</i> 14.0, 6.5         | 2.88, dd, <i>J</i> 13.8, 6.8           |
| 3                  | 2.79, dd, <i>J</i> 14.3, 7.8         | 2.74, dd, <i>J</i> 13.8, 8.3           | 2.88, dd, <i>J</i> 14.0, 7.5         | 2.81, dd, <i>J</i> 13.5, 7.5           |
| Ph <sub>2,6</sub>  | 6.96, d, <i>J</i> 8.6                | 7.01, d, <i>J</i> 8.0                  | 6.97, d, <i>J</i> 8.0                | 6.96, d, <i>J</i> 8.6                  |
| Ph <sub>3,5</sub>  | 6.64, d, <i>J</i> 8.0                | 6.69, d, <i>J</i> 8.6                  | 6.67, d, <i>J</i> 8.6                | 6.67, d, <i>J</i> 9.0                  |
| OH                 | 4.73, brs                            | 4.73, brs                              | 5.0x                                 | 5.0x                                   |
| DabNH              | 8.79, d, <i>J</i> 8.6                | 8.86, d, <i>J</i> 7.7                  | 8.84, t, <i>J</i> 5.7                | 8.52, t, <i>J</i> 5.4                  |
| 2                  | 4.41, q, <i>J</i> 7.3                | 4.44, q, <i>J</i> 7.3                  | 3.80, m                              | 3.80, m                                |
| 3                  | 1.93, m                              | 1.88, m                                | 1.81, m                              | 1.79, m                                |
| 3                  | 1.80, m                              | 1.77, m                                | 1.81, m                              | 1.79, m                                |
| 4                  | 2.79, m                              | 2.74, m                                | 3.17, m                              | 3.17, m                                |
| 5NH <sub>2</sub>   | 7.90, s                              | 7.83, s                                | 8.13, d, <i>J</i> 4.5                | 8.13, d, <i>J</i> 5.5                  |
| GlyNH              | 8.36, t, <i>J</i> 6.0                | 8.51, t, <i>J</i> 5.7                  | 8.50, t, <i>J</i> 5.7                | 8.84, t, <i>J</i> 5.7                  |
| 2                  | 3.82, dd, <i>J</i> 17.8, 6.3         | 3.78, dd, <i>J</i> 17.5, 6.0           | 3.91, dd, <i>J</i> 17.8, 6.3         | 3.90, dd, <i>J</i> 17.8, 5.7           |
| 2                  | 3.71, dd, <i>J</i> 17.8, 5.7         | 3.74, dd, <i>J</i> 17.0, 5.5           | 3.80, dd, <i>J</i> 17.5, 5.5         | 3.80, dd, <i>J</i> 17.5, 5.5           |
| OH                 | 9.38, brs                            | 9.35, brs                              | 9.38, brs                            | 9.38, brs                              |

**Table S2.** <sup>1</sup>H-NMR assignments of Ocf A (5), Ocf B (6), Bk-1119 (5)

|                    | Ocf A (5) | Ocf B (6) | Bk-1119 (10)      |
|--------------------|-----------|-----------|-------------------|
| TyrNH <sub>2</sub> | 8.00      | 8.00      | 8.05, m, 1H       |
| 2                  | 4.42      | 4.42      | 4.13, m, 1H       |
| 3                  | 5.16      | 5.16      | 5.03, brs, 1H     |
| 3                  |           |           |                   |
| Ph <sub>2,6</sub>  | 7.17      | 7.17      | 7.12, d, J8.0, 2H |
| Ph <sub>3,5</sub>  | 6.76      | 6.76      | 6.63, d, J8.0, 2H |
| OH                 | -         | -         | 5.68, s, 1H       |
| DabNH              | 8.04      | 8.04      | 7.69, m, 1H       |
| 2                  | 4.39      | 4.39      | 4.35, m, 1H       |
| 3                  | 1.96      | 1.96      | 1.86, m, 1H       |
| 3                  | 2.15      | 2.15      | 2.03, m, 1H       |
| 4                  | 2.90      | 2.90      | 2.86, m, 2H       |
| 5NH <sub>2</sub>   | 7.49      | 7.49      |                   |
| GlyNH              | 7.93      | 7.93      | 7.95, brs, 1H     |
| 2                  | 3.72      | 3.72      | 3.63, m, 1H       |
| 2                  | 3.94      | 3.94      | 3.72, m, 1H       |
| OH                 |           |           |                   |

**Reference**

- 1) Lin, Z.; Falkinham, J. O. III; Tawfik, K. A.; Jeffs, P.; Bray, B.; Dubay, G.; Cox, J. E.; Schmidt, E. W. Burkholdines from Burkholderia: antifungal agents and possible virulence factors. *J. Nat. Prod.* **2012**, *75*, 1518-1523.
- 2) Lu, S.-E.; Novak, J.; Austin, F. W.; Gu, G.; Ellis, D.; Kirk, M.; Wilson-Stanford, S.; Tonelli, M.; Smith, L. *Biochemistry* **2009**, *48*, 8312-8321

**Table S3.**  $^1\text{H}$ -and  $^{13}\text{C}$ -NMR of Ocfs A (**5**), E (**9**), and isolated Bk-1119 (**5**)

| AA           |                 | Ocf E (DMSO-d6) |                 | Ocf A (5)<br>(DMSO-d6) |                 | Bk-1119 (10) <sup>3</sup> (DMSO-d6) |                 | Δ            | Δ            |
|--------------|-----------------|-----------------|-----------------|------------------------|-----------------|-------------------------------------|-----------------|--------------|--------------|
|              |                 | <sup>1</sup> H  | <sup>13</sup> C | <sup>1</sup> H         | <sup>13</sup> C | <sup>1</sup> H                      | <sup>13</sup> C | E-Bk         | A-Bk         |
| Tyr          | 1               |                 |                 |                        |                 |                                     |                 |              |              |
|              | NH              | 7.95            |                 | 8.02                   |                 | 8.05, m                             |                 | -0.1         | -0.03        |
|              | 2               | 4.14            |                 | 4.18                   | 63.1            | 4.13, m                             | 60.8            | 0.01         | 0.05         |
|              | 3               | 5.09            |                 | 5.08                   | 73.9            | 5.03, brs                           | 71.7            | 0.06         | 0.05         |
|              | Ph1             |                 |                 |                        |                 |                                     | 131.0           |              |              |
|              | Ph2,6           | 7.15            |                 |                        |                 | 7.12, d (8.0)                       | 128.0           | 0.03         |              |
|              | Ph3,5           | 6.68            |                 |                        |                 | 6.63, d (8.0)                       | 115.4           | 0.05         |              |
|              | Ph4             |                 |                 |                        |                 |                                     |                 |              |              |
|              | OH              | 5.73,9.33       |                 |                        |                 | 5.68, s                             |                 | 0.05         |              |
| Dab          | 1               |                 |                 |                        | 172.1           |                                     |                 |              |              |
|              | NH              | 7.65            |                 | 7.71                   |                 | 7.69, brs                           |                 | -0.04        | 0.02         |
|              | 2               | 4.42            |                 | 4.39                   | 53.9            | 4.35, m                             | 51.3            | 0.07         | 0.04         |
|              | 3               | 2.11, 1.89      |                 | 2.11,<br>1.91          | 32.8            | 2.03, m,<br>1.86, m                 | 30.3            | 0.08<br>0.03 | 0.08<br>0.05 |
|              | 4               | 2.92            |                 | 2.92                   | 32.8            | 2.86, m,                            | 36.7            | 0.06         | 0.06         |
|              | NH <sub>2</sub> | 7.75            |                 |                        |                 |                                     |                 |              |              |
| Gly          | 1               |                 |                 |                        | 170.9           |                                     |                 |              |              |
|              | NH              | 7.98            |                 | 7.93                   |                 | 7.95, brs                           |                 | 0.03         | -0.02        |
|              | 2               | 3.81, 3.64      |                 | 3.81,<br>3.64          | 45.1            | 3.72, m,<br>3.63, m                 | 42.8            | 0.09<br>0.01 | 0.09<br>0.01 |
| Asn<br>(Asp) | 1               |                 |                 |                        |                 |                                     |                 |              |              |
|              | NH              | 8.41            |                 | 8.36                   |                 | 8.29, m                             |                 | 0.12         | 0.07         |
|              | 2               | 4.57            |                 | 4.58                   | 58.7            | 4.52, m                             | 50.4            | 0.05         | 0.06         |
|              | 3               | 2.76, 2.50      | 38.6            | 2.63, 2.41             | 40.1            | 2.56, m,<br>2.37, m                 | 37.5            | 0.2<br>0.13  | 0.07<br>0.04 |
|              | 4               |                 |                 |                        |                 |                                     |                 |              |              |
|              | NH <sub>2</sub> | 7.41            |                 |                        |                 |                                     |                 |              |              |
| Ser I        | 1               |                 |                 |                        | 169.6           |                                     |                 |              |              |
|              | NH              | 7.80            |                 | 7.81                   |                 | 8.02, m                             |                 | -0.22        | -0.21        |
|              | 2               | 4.23            | 58.3            | 4.20                   | 58.7            | 4.18, m                             | 56.4            | 0.05         | 0.02         |
|              | 3               | 3.58            | 64.2            | 3.62                   | 63.1            | 3.38, m, 3.29, m                    | 61.9            | 0.20, 0.29   | 0.24,0.33    |

|       |                       |            |      |               |               |                     |       |               |              |
|-------|-----------------------|------------|------|---------------|---------------|---------------------|-------|---------------|--------------|
|       |                       |            |      |               |               |                     |       |               | 0.33         |
|       | OH                    | 4.83       |      |               |               |                     |       |               |              |
| AsnII | 1                     |            |      |               |               |                     |       |               |              |
|       | 1NH                   | 8.09       |      | 8.13          | 172.7         | 8.04, m             |       | 0.05          | 0.09         |
|       | 2                     | 4.52       |      | 4.53          | 52.9          | 4.48, m             | 50.5  | 0.04          | 0.05         |
|       | 3                     | 2.52, 2.35 |      | 2.58,<br>2.36 | 40.1          | 2.48, m,<br>2.31, m | 37.9  | 0.04<br>0.04  | 0.1<br>0.05  |
|       | 4                     |            |      |               |               |                     |       |               |              |
|       | NH <sub>2</sub><br>OH | 7.26,6.86  |      | 7.23,<br>6.84 |               |                     |       |               |              |
| ATHOD | 1                     |            |      |               | 170.9         |                     |       |               |              |
|       | 2                     | 2.40, 2.32 |      | 2.38          | 40.0          | 2.36, m,<br>2.29, m | 41.4  | 0.04<br>0.03  | 0.02<br>0.09 |
|       | 3                     | 4.15       | 47.4 | 4.14          | 47.5          | 4.11, m             | 45.1  | 0.04          | 0.03         |
|       | NH                    | 7.53       |      | 7.49          |               | 7.48, brs           |       | 0.05          | 0.01         |
|       | 4                     | 1.76, 1.35 |      | 1.77          | 41.3          | 1.72, m,<br>1.40, m | N.D   | 0.03<br>-0.05 | 0.05         |
|       | 5                     | 3.51       |      |               |               | 3.40, m             | 67.9  | 0.11          |              |
|       | 5OH                   | 4.17       |      |               |               |                     |       |               |              |
|       | 6                     | 3.05       |      |               |               | 3.07, m             | 75.6  | -0.02         |              |
|       | 6OH                   | 4.08       |      |               |               |                     |       |               |              |
|       | 7                     | 3.75       |      |               |               | 3.68, m             | 77.8  | 0.07          |              |
|       | 8                     | 1.36       |      |               |               | 1.51, m,<br>1.50, m | 30.6  | -0.15         |              |
| 9-17  | 1.31                  |            |      |               | 1.24, m       | 23-32               | 0.07  |               |              |
| 18    | 0.86                  |            |      |               | 0.82, t (6.5) | 14.8                | 0.04  |               |              |
| SerII | 1                     |            |      |               |               |                     |       |               |              |
|       | NH                    | 8.07       |      | 8.13          |               | 7.72, d (6.6)       |       | 0.35          | 0.41         |
|       | 2                     | 4.18       |      | 4.21          | 58.9          | 4.16, m             | 56.3  | 0.02          | 0.05         |
|       | 3                     | 3.42       |      |               |               | 3.55, m             | 61.9  | -0.07         |              |
| Xyl   | OH                    | 4.97       |      |               |               | 4.78, brs           |       | 0.21          |              |
|       | H1                    | 4.18       |      |               |               | 4.14, m             | 102.7 | 0.04          |              |
|       | H2                    | 2.99       |      |               |               | 2.94, m             | 73.7  | 0.05          |              |

|    |            |  |  |  |                     |      |              |
|----|------------|--|--|--|---------------------|------|--------------|
| H3 | 3.28,4.94  |  |  |  | 3.06, m             | 77.2 | 0.22         |
| H4 | 3.10,4.93  |  |  |  | 3.26, m             | 70.2 | -0.16        |
| H5 | 3.72, 3.06 |  |  |  | 3.67, m,<br>3.01, m | 66.3 | 0.05<br>0.05 |

**Fig. S1a.** Difference between chemical shifts of Ocf E (9), Ocf A (5) and Bk-1119 (5)

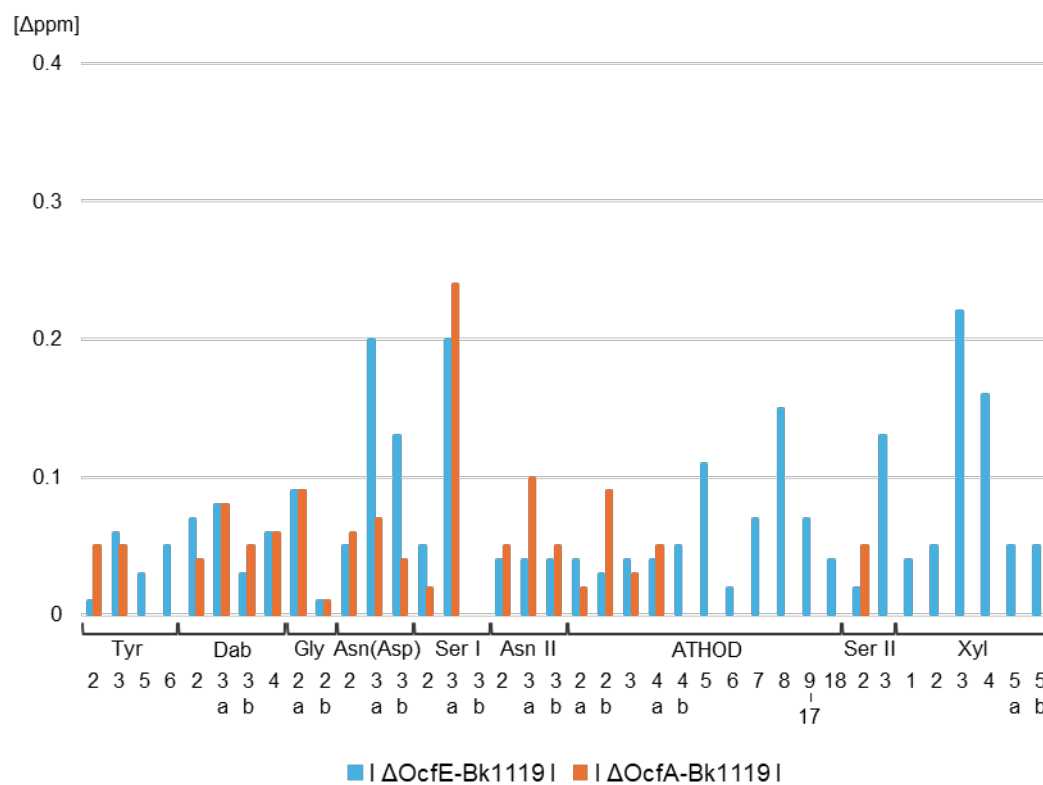

**Fig. S1b.** Difference in chemical shifts between Ocf E (9), OcfA (5) and Bk-1119(5)

(revised)

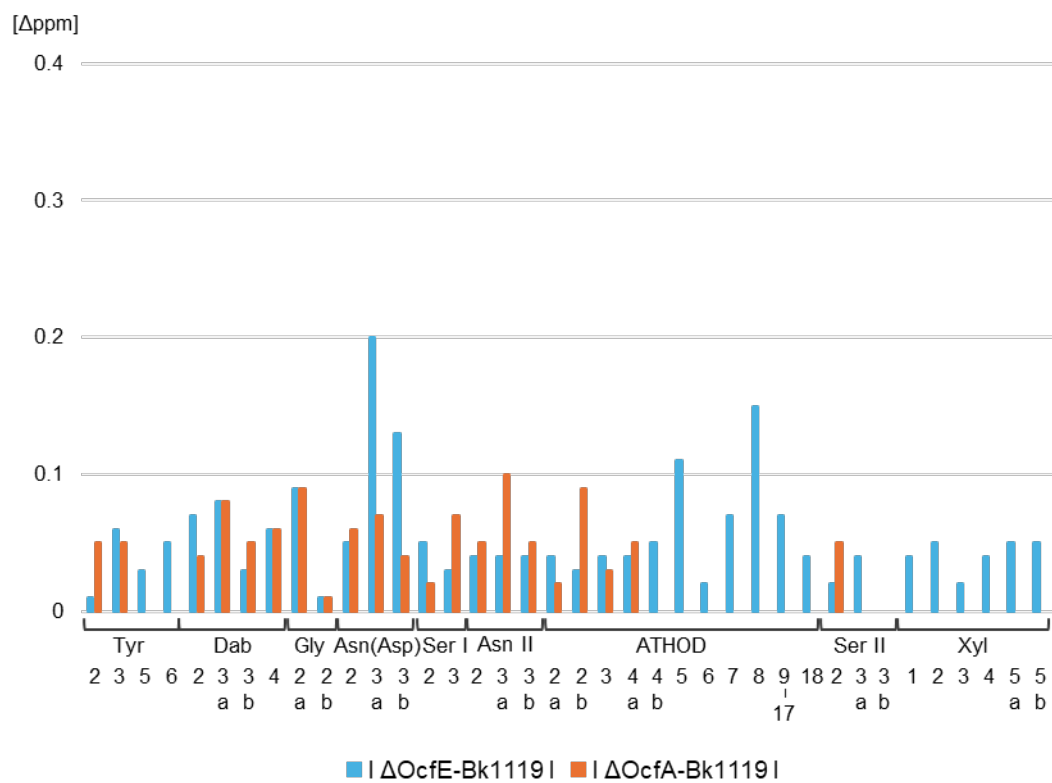



**Table S4.** Difference in <sup>1</sup>H-chemical shifts between the values of **5**, **6** **11a-b**, **12a-b** and **13-18**.

| entry | peptide   | H $\alpha$ | Ocf A ( <b>5</b> ) ( $\Delta$ ) | Ocf B ( <b>6</b> ) ( $\Delta$ ) | <b>11a</b> ( $\Delta$ ) | <b>11b</b> ( $\Delta$ ) | <b>12a</b> ( $\Delta$ ) | <b>12b</b> ( $\Delta$ ) |
|-------|-----------|------------|---------------------------------|---------------------------------|-------------------------|-------------------------|-------------------------|-------------------------|
| 1     | <b>13</b> | 4.50       | -0.11                           | -0.11                           | -0.08                   | -0.07                   | -0.60                   | -0.59                   |
| 2     | <b>14</b> | 4.21       | 0.18                            | 0.18                            | 0.21                    | 0.22                    | -0.31                   | -0.46                   |
| 3     | <b>15</b> | 4.38       | 0.01                            | 0.01                            | 0.04                    | 0.05                    | -0.48                   | -0.47                   |
| 4     | <b>16</b> | 4.44       | -0.05                           | -0.05                           | -0.02                   | -0.01                   | -0.54                   | -0.53                   |
| 5     | <b>17</b> | 3.88       | 0.51                            | 0.51                            | 0.54                    | 0.55                    | 0.02                    | 0.03                    |
| 6     | <b>18</b> | 3.77       | 0.62                            | 0.62                            | 0.65                    | 0.66                    | 0.13                    | 0.14                    |

H $\alpha$  (ppm) = chemical shift of  $\alpha$ -proton of DAB residue of cyclic peptides

Ocf A (**5**) ( $\Delta$ ) = 4.39 ppm – H $\alpha$ ; Ocf B (**6**) ( $\Delta$ ) = 4.39 ppm – H $\alpha$ ; **11a** ( $\Delta$ ) = 4.42 ppm – H $\alpha$ ; **11b** ( $\Delta$ ) = 4.43 ppm – H $\alpha$ ; **12a** ( $\Delta$ ) = 3.90 ppm – H $\alpha$ ; **12b** ( $\Delta$ ) = 3.91 ppm – H $\alpha$ .

Appl. Environ. Microbiol. 2011, 77, 6189-6198.

Appl. Environ. Microbiol. 2013, 79, 2899-2905.

HPLC spectra

L-Tyr-L- $\alpha$ Dab-Gly (**11a**)

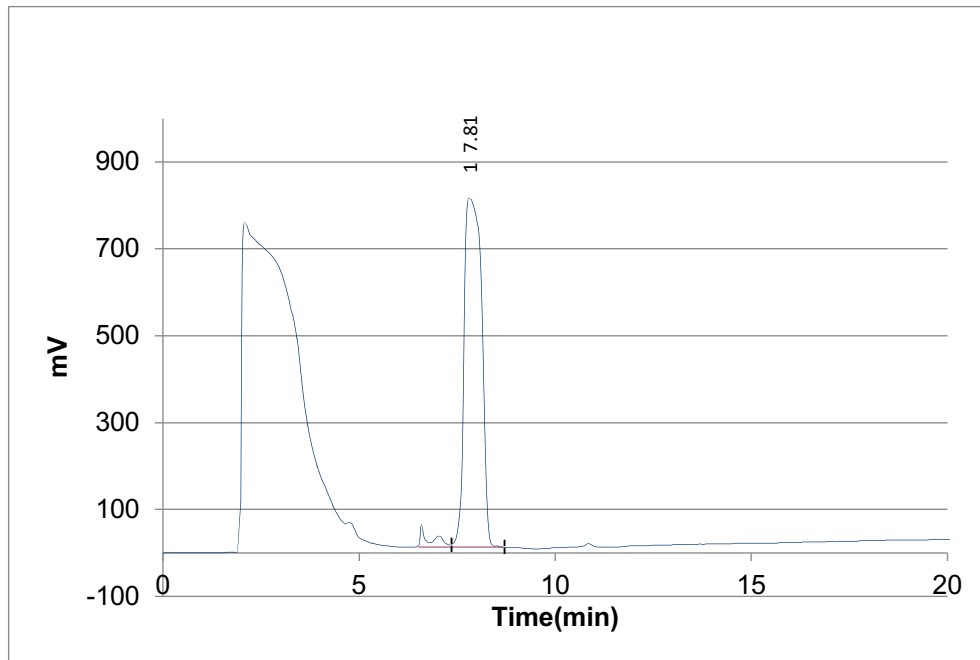

D-Tyr-L- $\alpha$ Dab-Gly (**11b**)

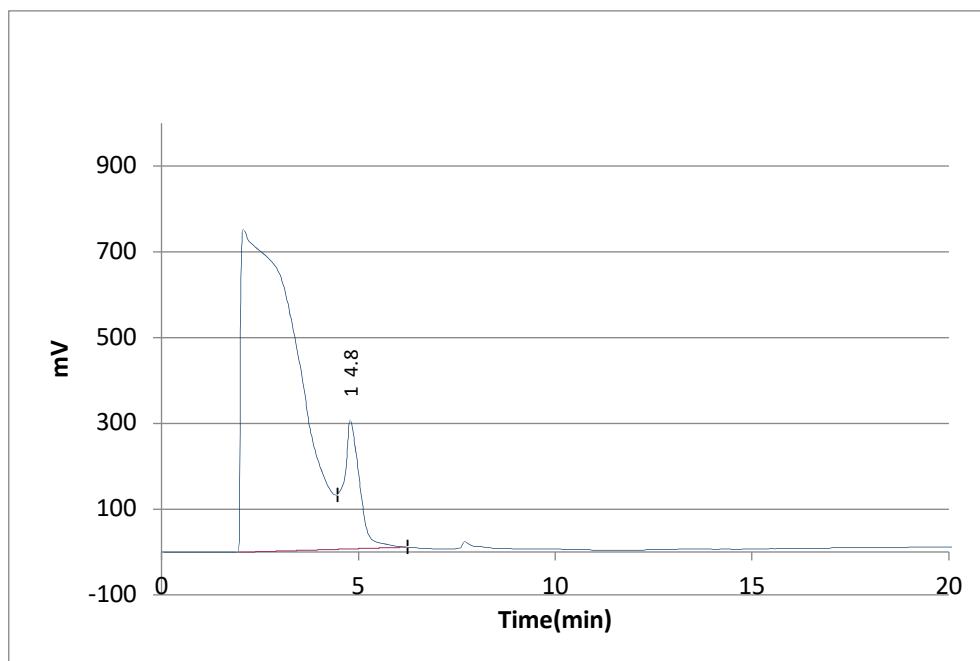

L-Tyr-L- $\gamma$ Dab-Gly (**12a**)

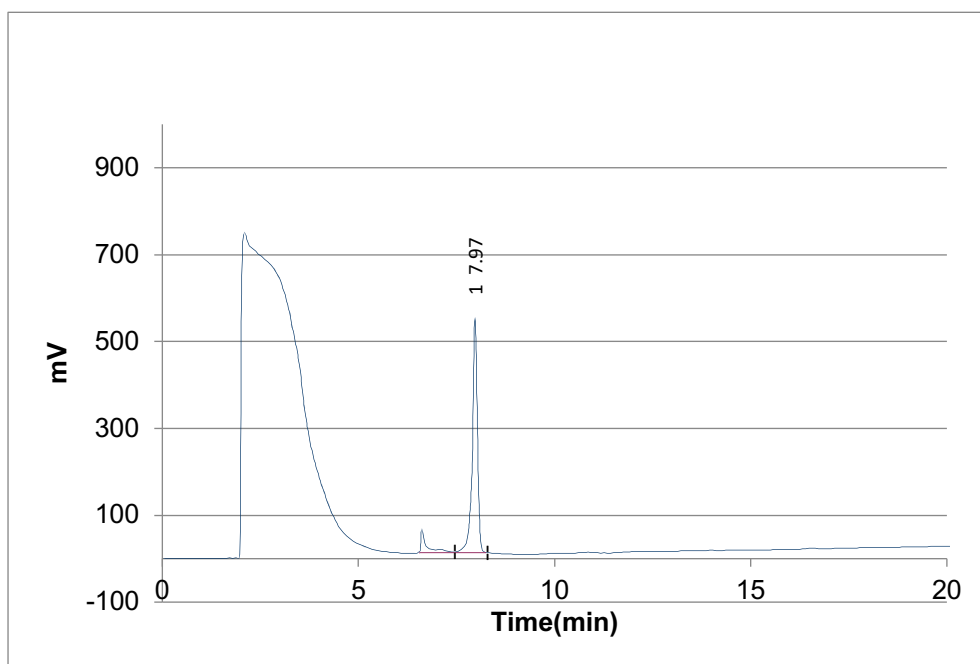

D-Tyr-L- $\gamma$ Dab-Gly (**12b**)

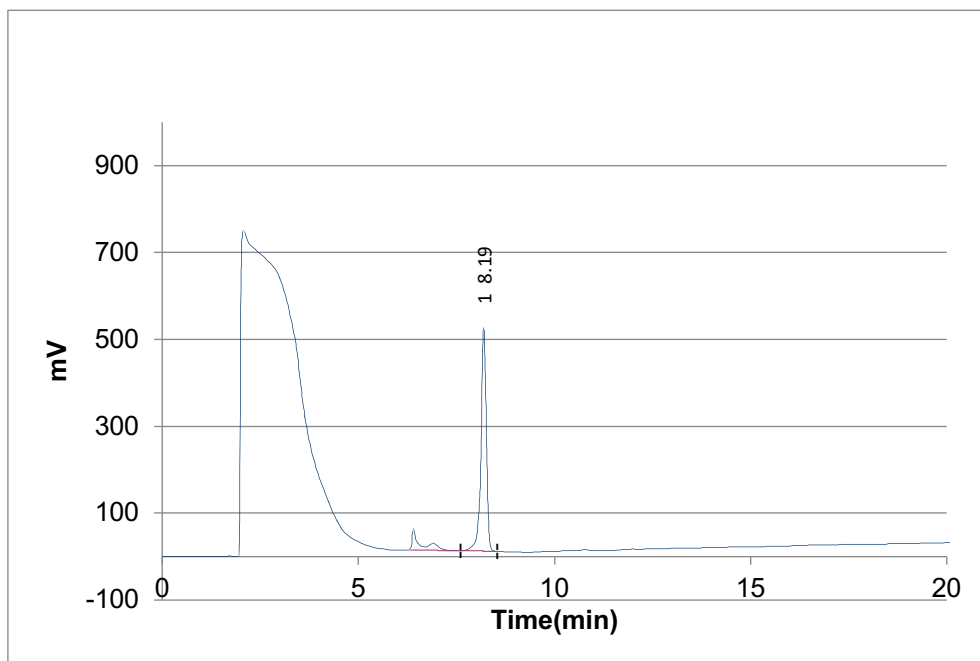

L-LAP-D-Ser(*t*Bu)-D-Tyr(*t*Bu)-D- $\alpha$ Dab(Boc)-Gly-Asn(Trt)-Ser(*t*Bu)-Asn(Trt)

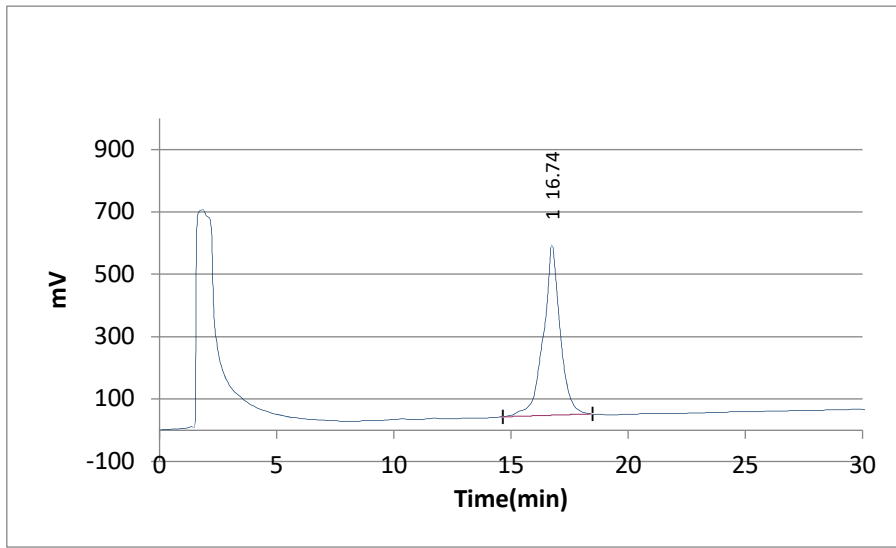

Cyclo-[L-LAP-D-Ser(*t*Bu)-D-Tyr(*t*Bu)-D- $\alpha$ Dab(Boc)-Gly-Asn(Trt)-Ser(*t*Bu)-Asn(Trt)]

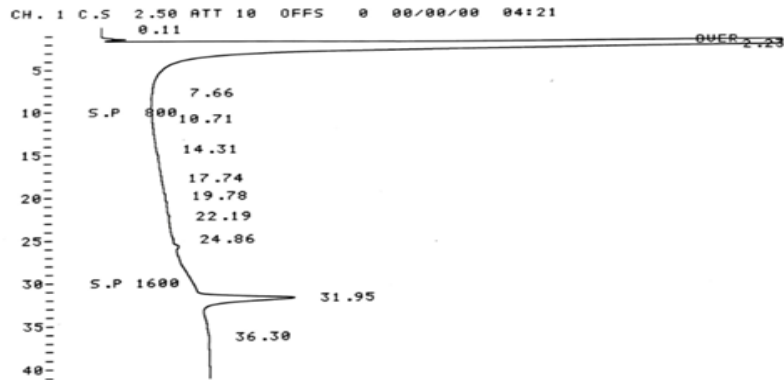

Cyclo-[L-LAP-D-Ser-D-Tyr-D- $\alpha$ Dab-Gly-Asn-Ser-Asn] (13)

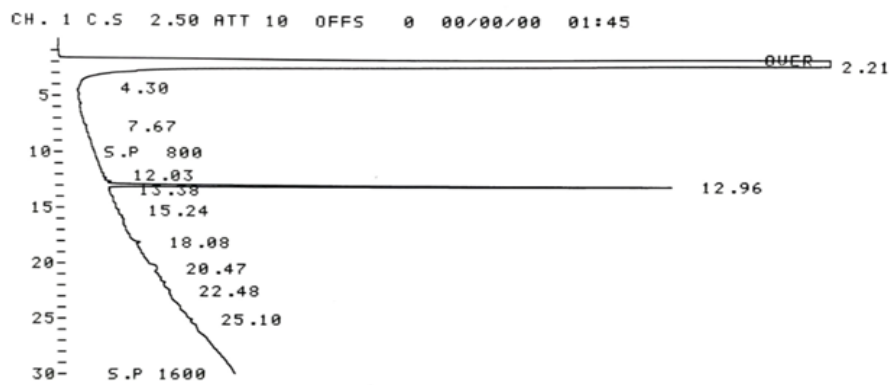

L-LAP-D-Ser(*t*Bu)-D-Tyr(*t*Bu)-L- $\alpha$ Dab(Boc)-Gly-Asn(Trt)-Ser(*t*Bu)-Asn(Trt)

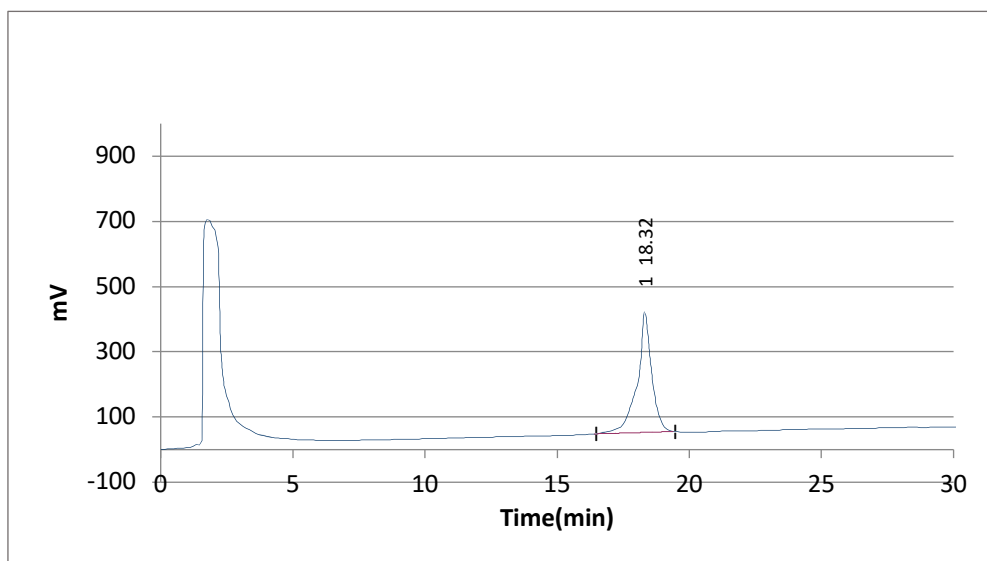

Cyclo-[L-LAP-D-Ser(*t*Bu)-D-Tyr(*t*Bu)-L- $\alpha$ Dab(Boc)-Gly-Asn(Trt)-Ser(*t*Bu)-Asn(Trt)]

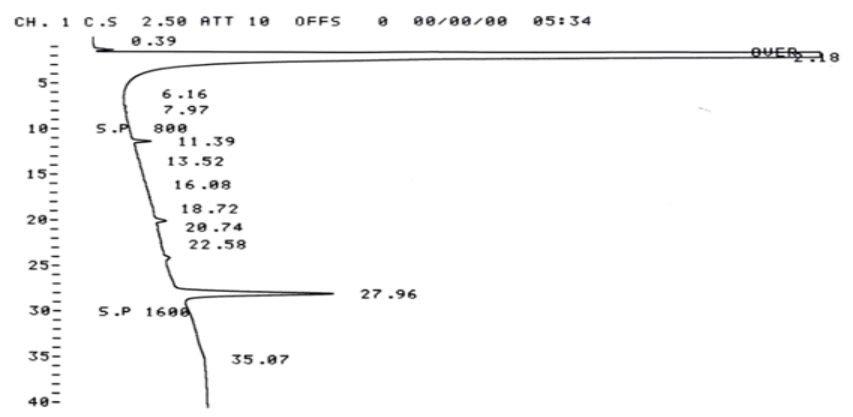

Cyclo-[L-LAP-D-Ser-D-Tyr-L- $\alpha$ Dab-Gly-Asn-Ser-Asn] (14)

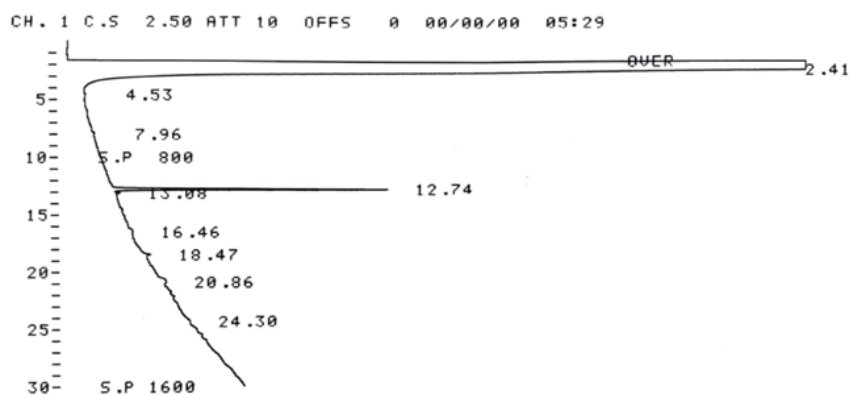

D-LAP-D-Ser(*t*Bu)-D-Tyr(*t*Bu)-D- $\alpha$ Dab(Boc)-Gly-Asn(Trt)-Ser(*t*Bu)-Asn(Trt)

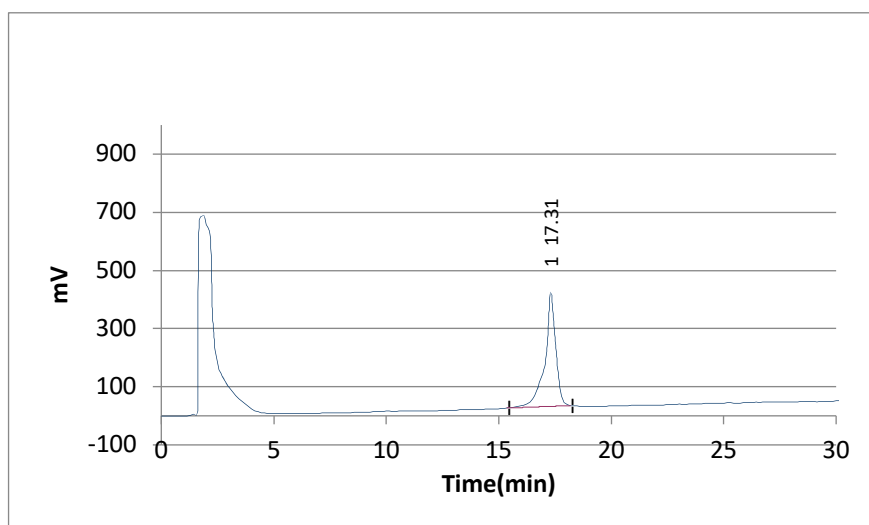

Cyclo-[D-LAP-D-Ser(*t*Bu)-D-Tyr(*t*Bu)-D- $\alpha$ Dab(Boc)-Gly-Asn(Trt)-Ser(*t*Bu)-Asn(Trt)]

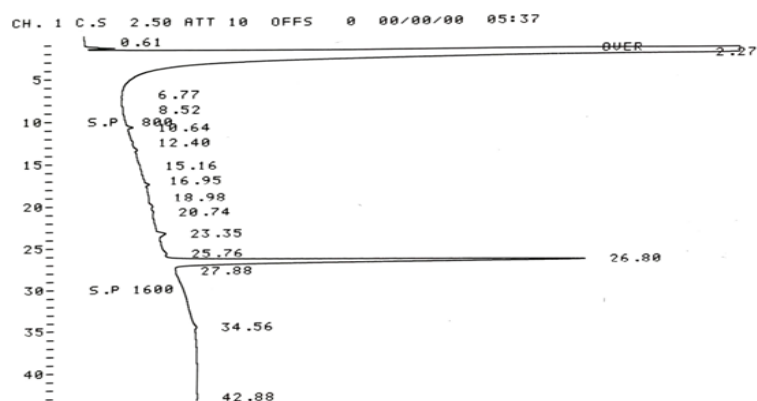

Cyclo-[D-LAP-D-Ser-D-Tyr-D- $\alpha$ Dab-Gly-Asn-Ser-Asn] (15)

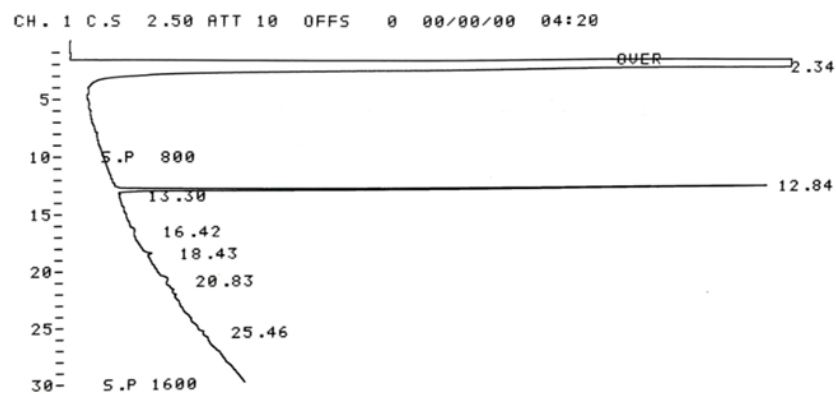

D-LAP-D-Ser(*t*Bu)-D-Tyr(*t*Bu)-L- $\alpha$ Dab(Boc)-Gly-Asn(Trt)-Ser(*t*Bu)-Asn(Trt)

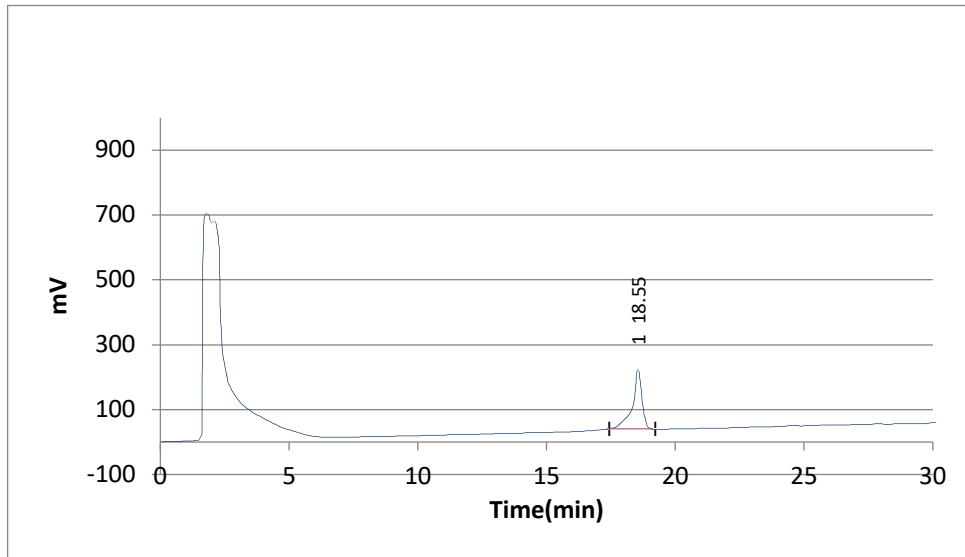

Cyclo-[D-LAP-D-Ser(*t*Bu)-D-Tyr(*t*Bu)-L- $\alpha$ Dab(Boc)-Gly-Asn(Trt)-Ser(*t*Bu)-Asn(Trt)]

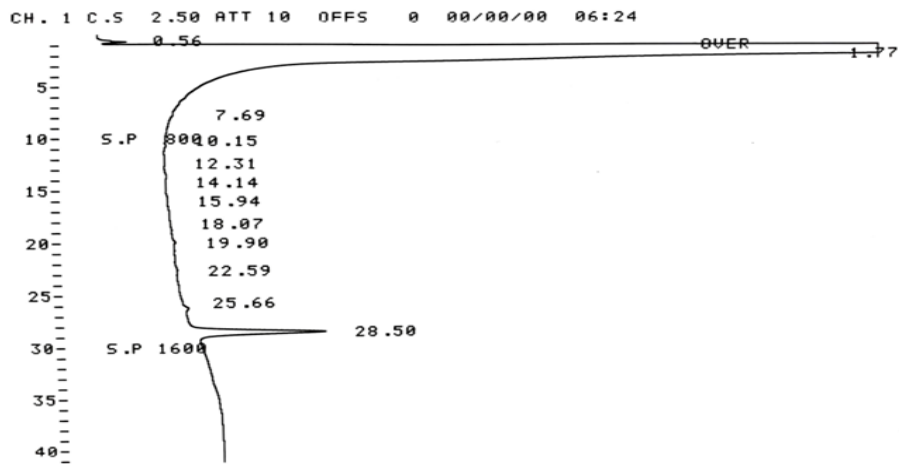

Cyclo-[D-LAP-D-Ser-D-Tyr-L- $\alpha$ Dab-Gly-Asn-Ser-Asn] (16)

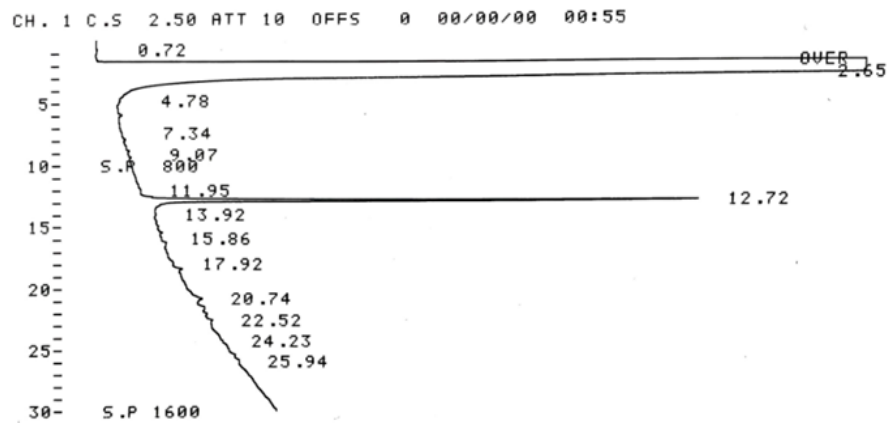

L-LAP-D-Ser(*t*Bu)-D-Tyr(*t*Bu)-L- $\gamma$ Dab(Boc)-Gly-Asn(Trt)-Ser(*t*Bu)-Asn(Trt)

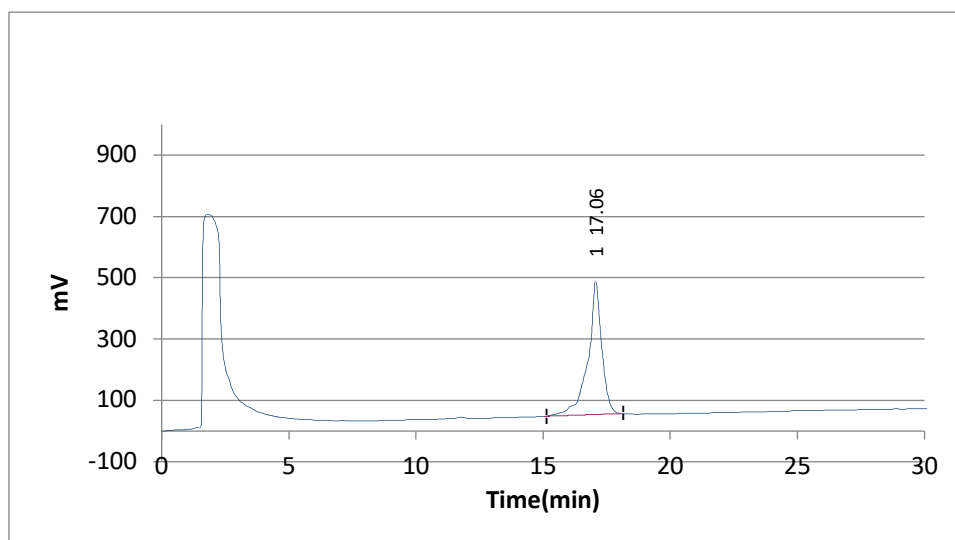

Cyclo-[L-LAP-D-Ser(*t*Bu)-D-Tyr(*t*Bu)-L- $\gamma$ Dab(Boc)-Gly-Asn(Trt)-Ser(*t*Bu)-Asn(Trt)]

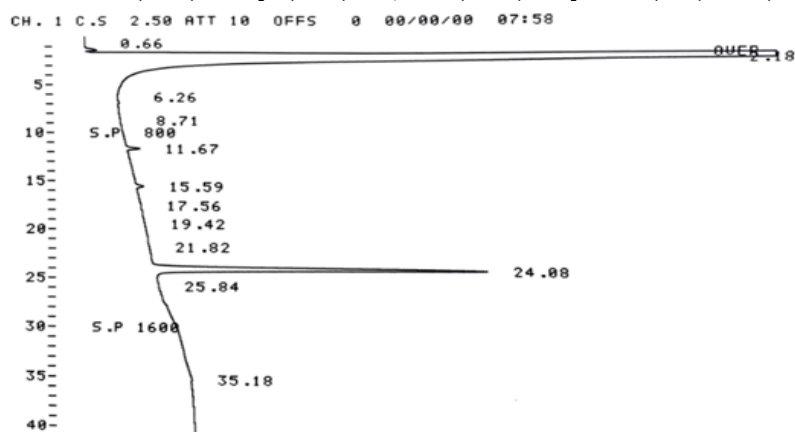

Cyclo-[L-LAP-D-Ser-D-Tyr-L- $\gamma$ Dab-Gly-Asn-Ser-Asn] (17)

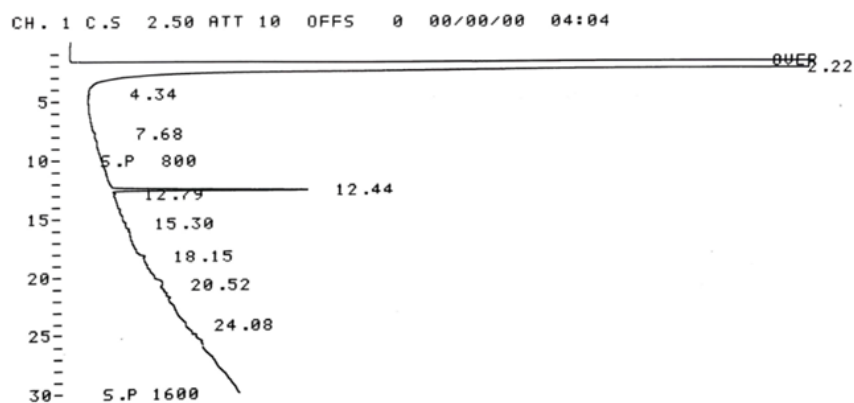



D-LAP-D-Ser(*t*Bu)-D-Tyr(*t*Bu)-L- $\gamma$ Dab(Boc)-Gly-Asn(Trt)-Ser(*t*Bu)-Asn(Trt)

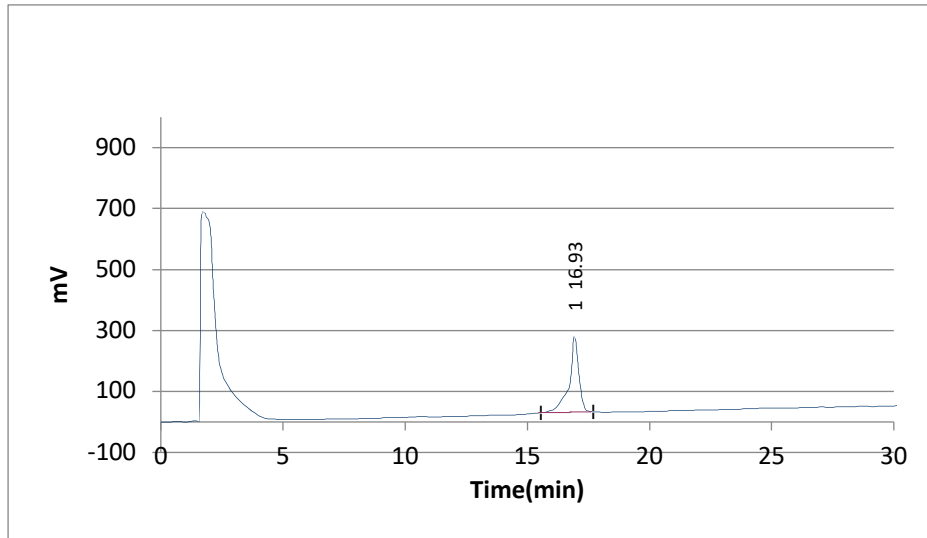

Cyclo-[D-LAP-D-Ser(*t*Bu)-D-Tyr(*t*Bu)-L- $\gamma$ Dab(Boc)-Gly-Asn(Trt)-Ser(*t*Bu)-Asn(Trt)]

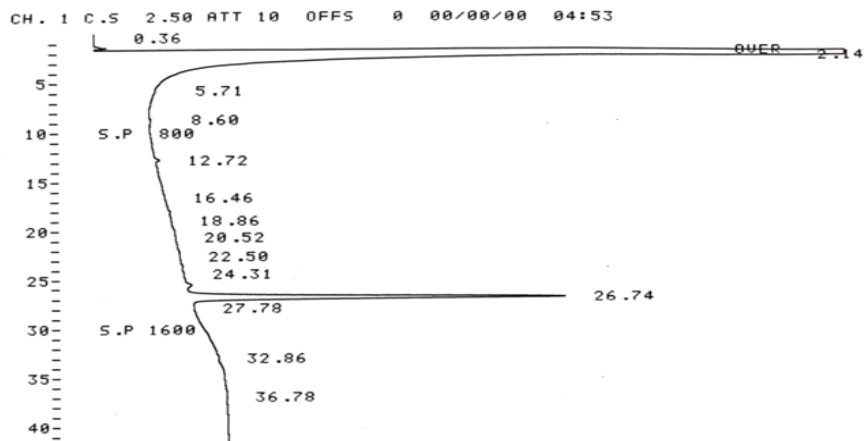

Cyclo-[D-LAP-D-Ser-D-Tyr-L- $\gamma$ Dab-Gly-Asn-Ser-Asn] (18)

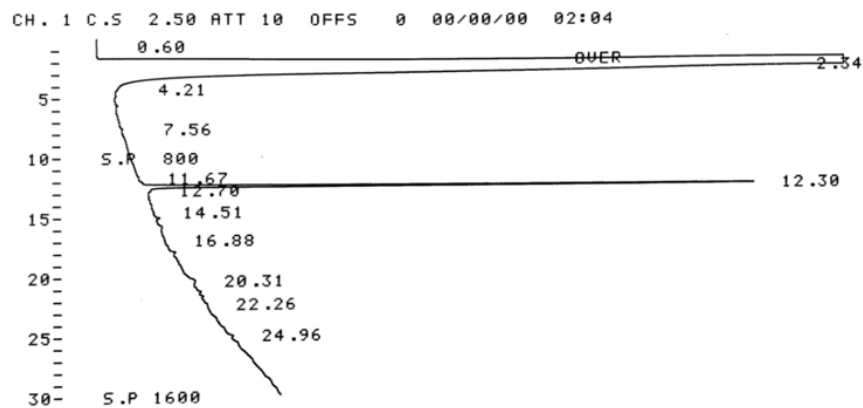

# NMR spectra

## L-Tyr-L- $\alpha$ Dab-Gly (11a)

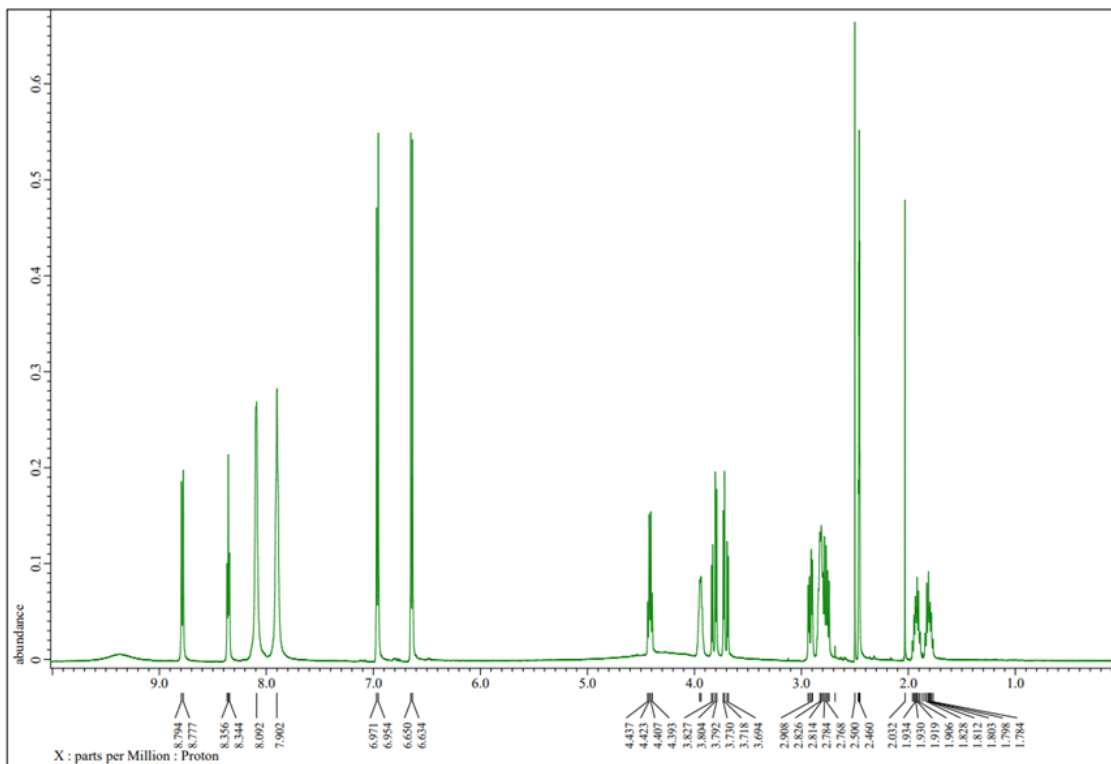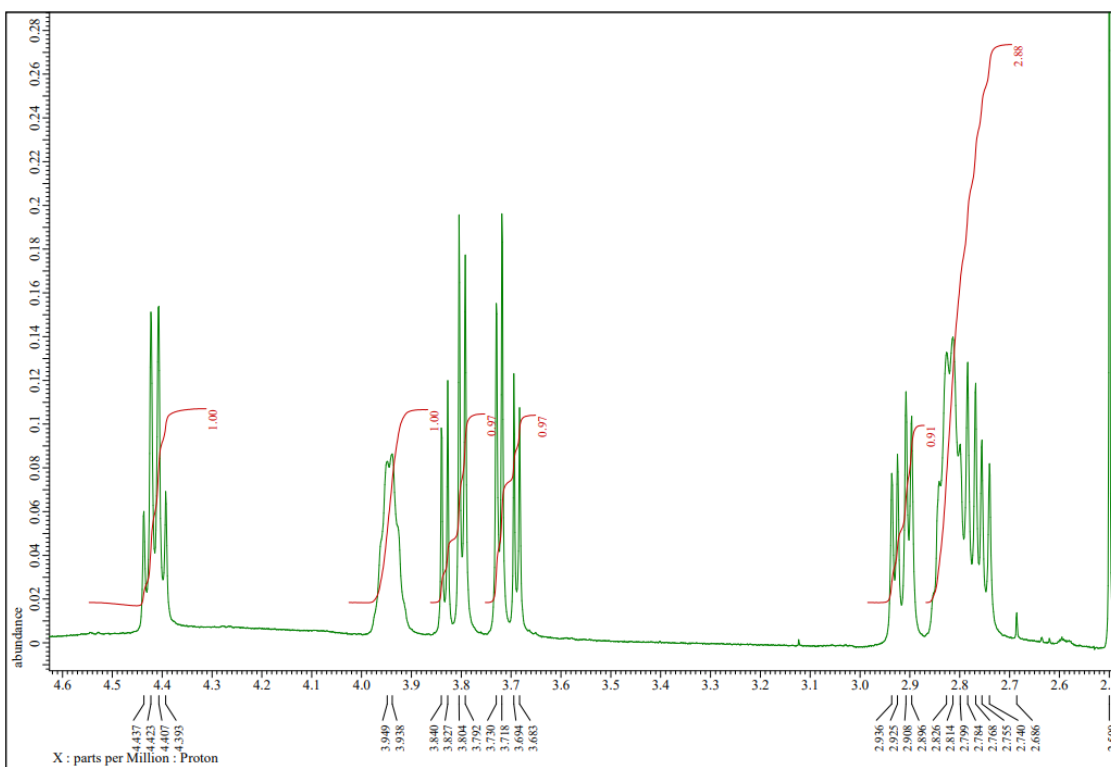

# D-Tyr-L- $\alpha$ Dab-Gly (11b)

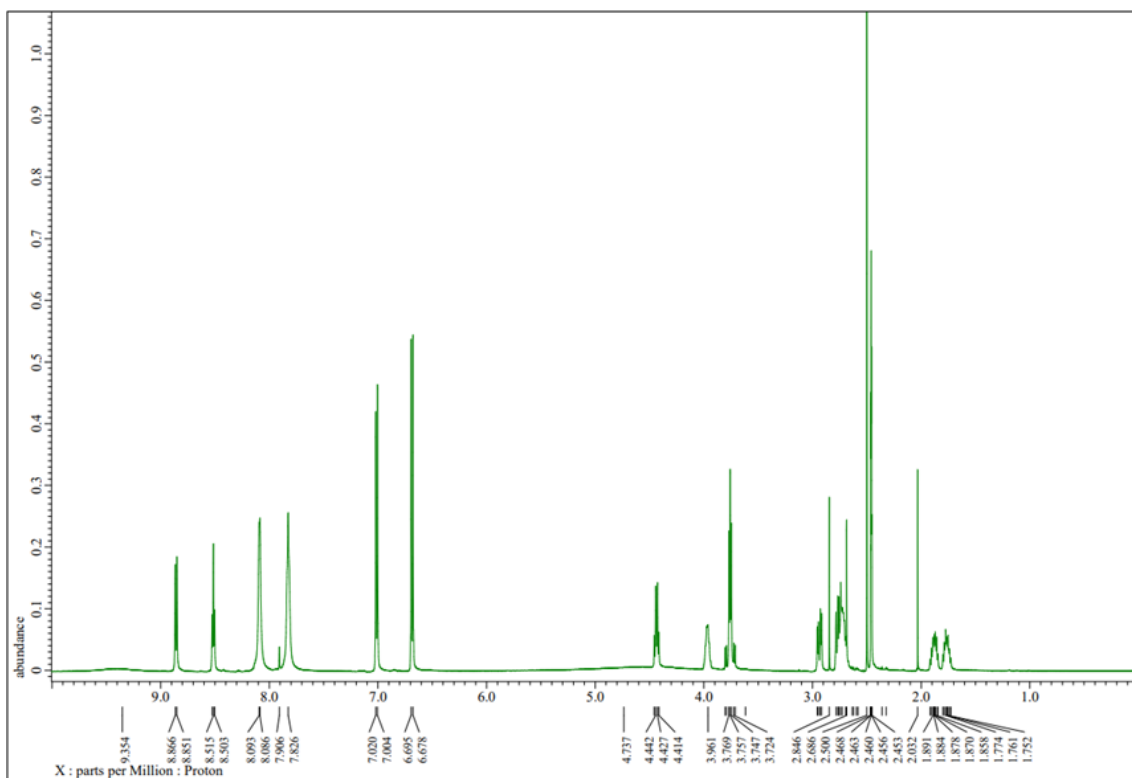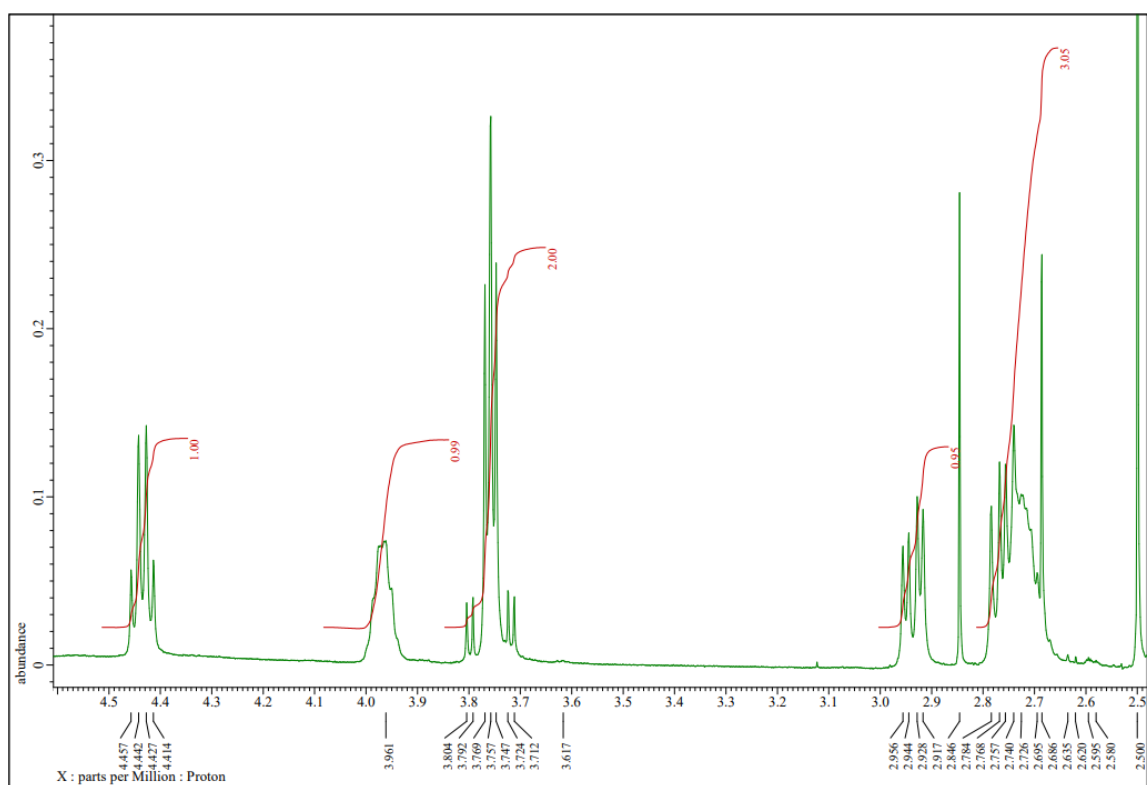

L-Tyr-L- $\gamma$ Dab-Gly (**12a**)

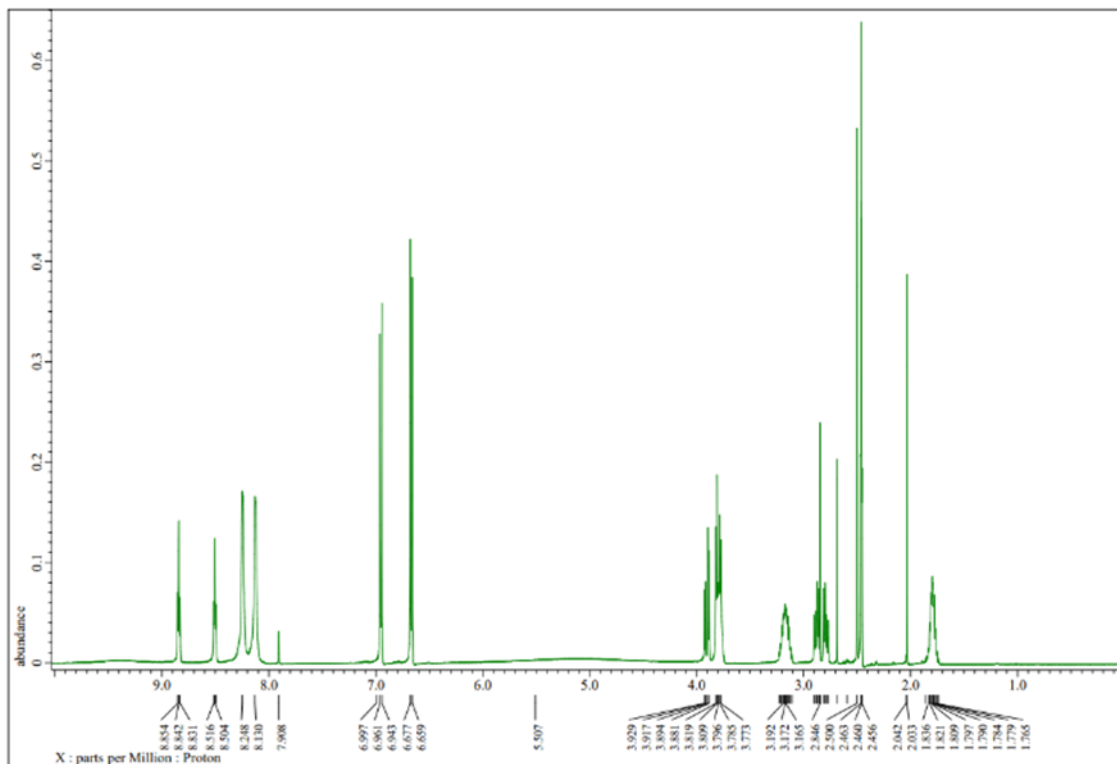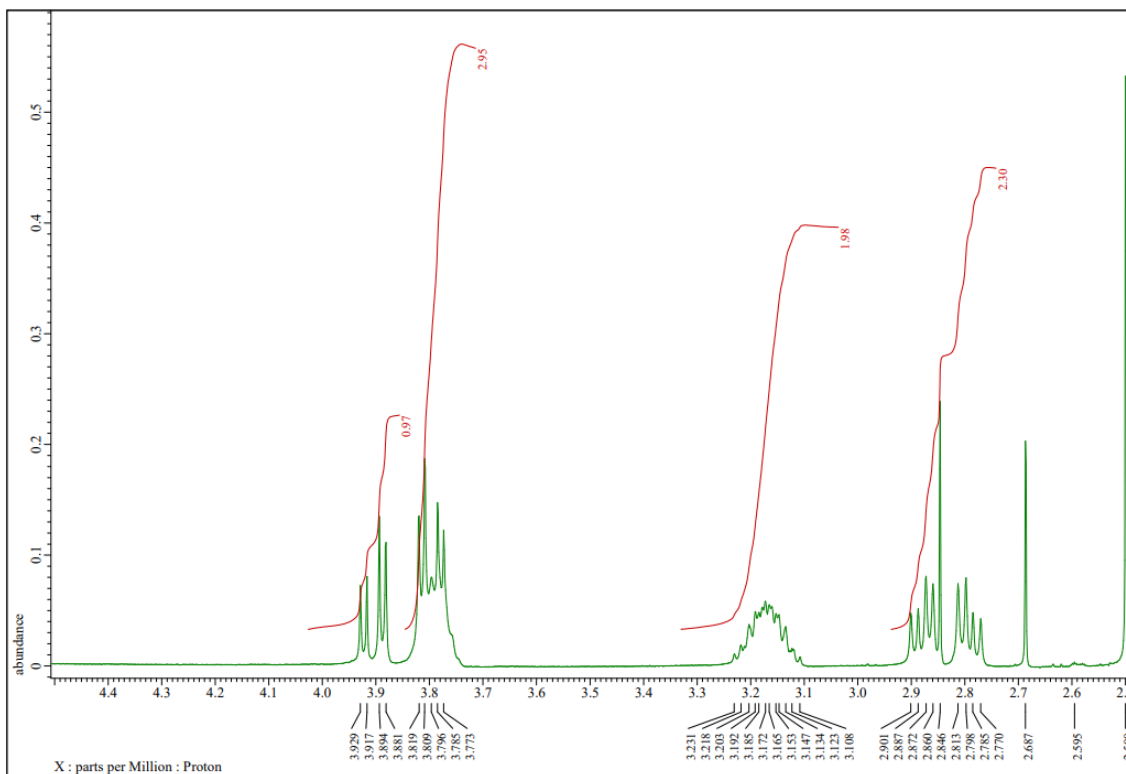

# D-Tyr-L- $\gamma$ Dab-Gly (**12b**)

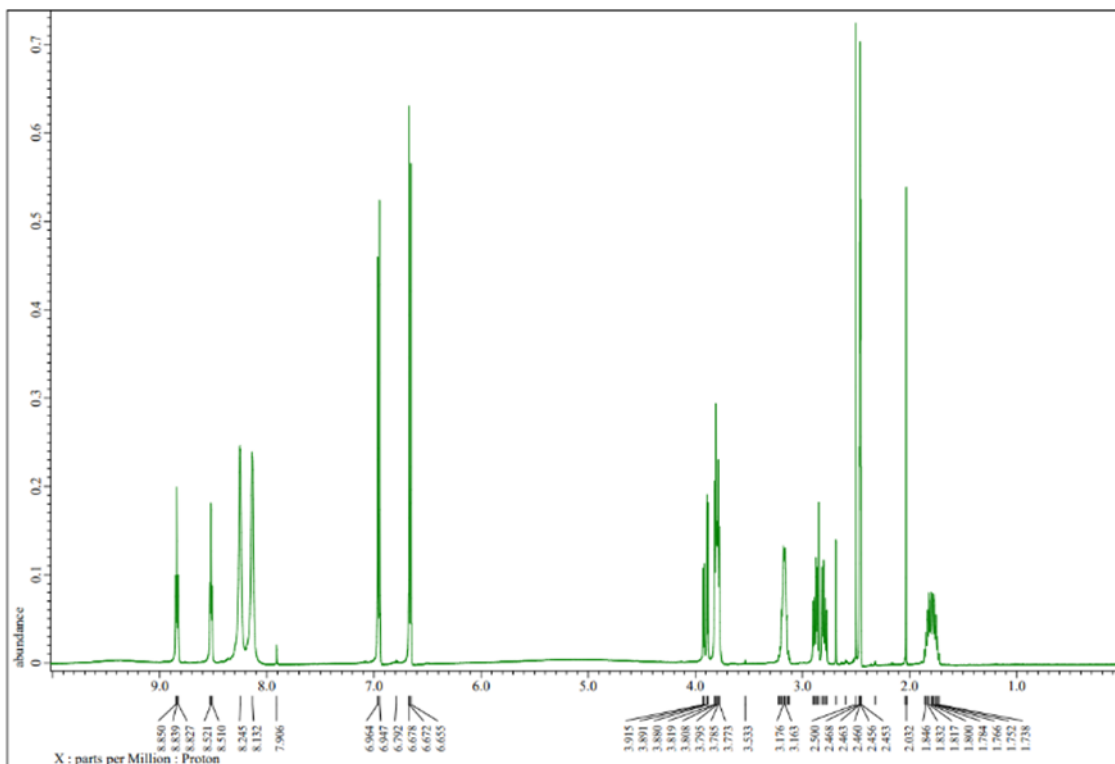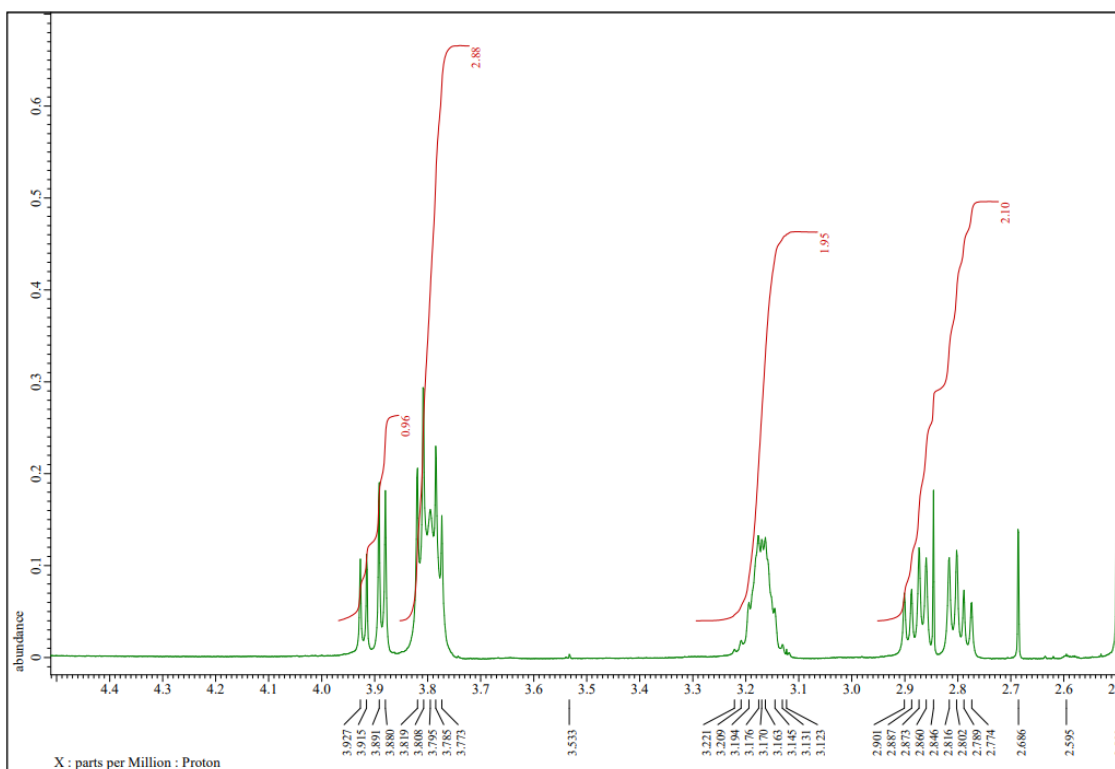

Cyclo-[L-LAP-D-Ser-D-Tyr-D- $\alpha$ Dab-Gly-Asn-Ser-Asn] (**13**)

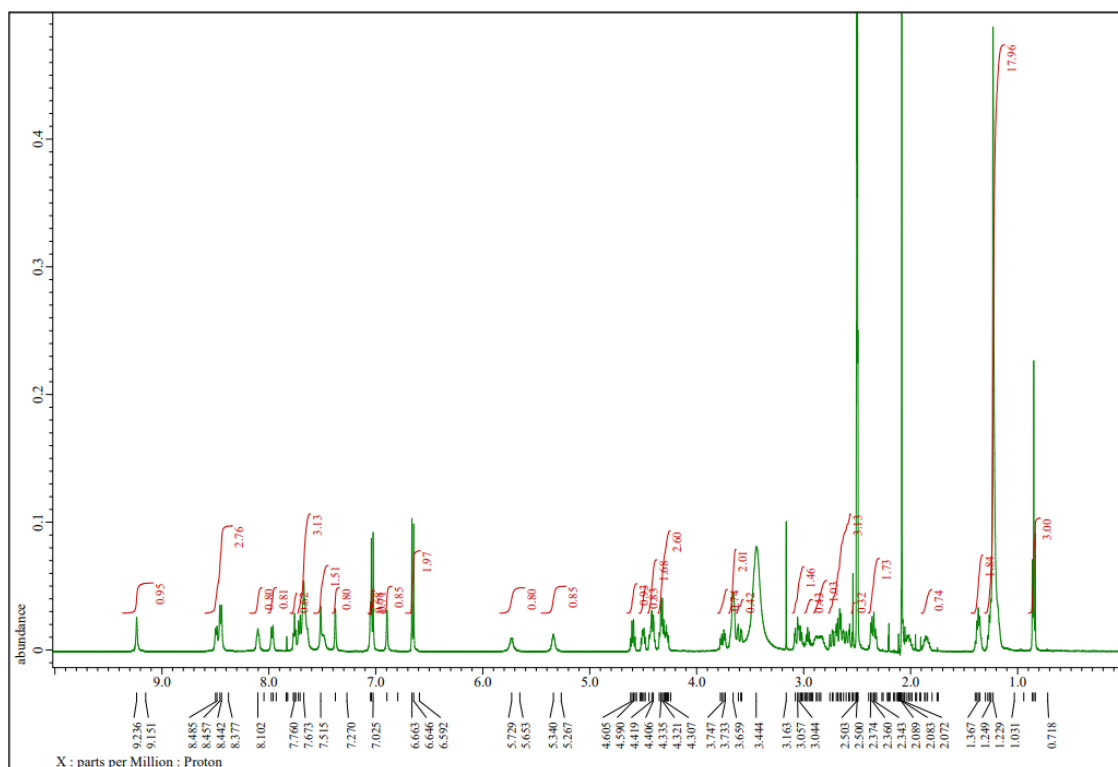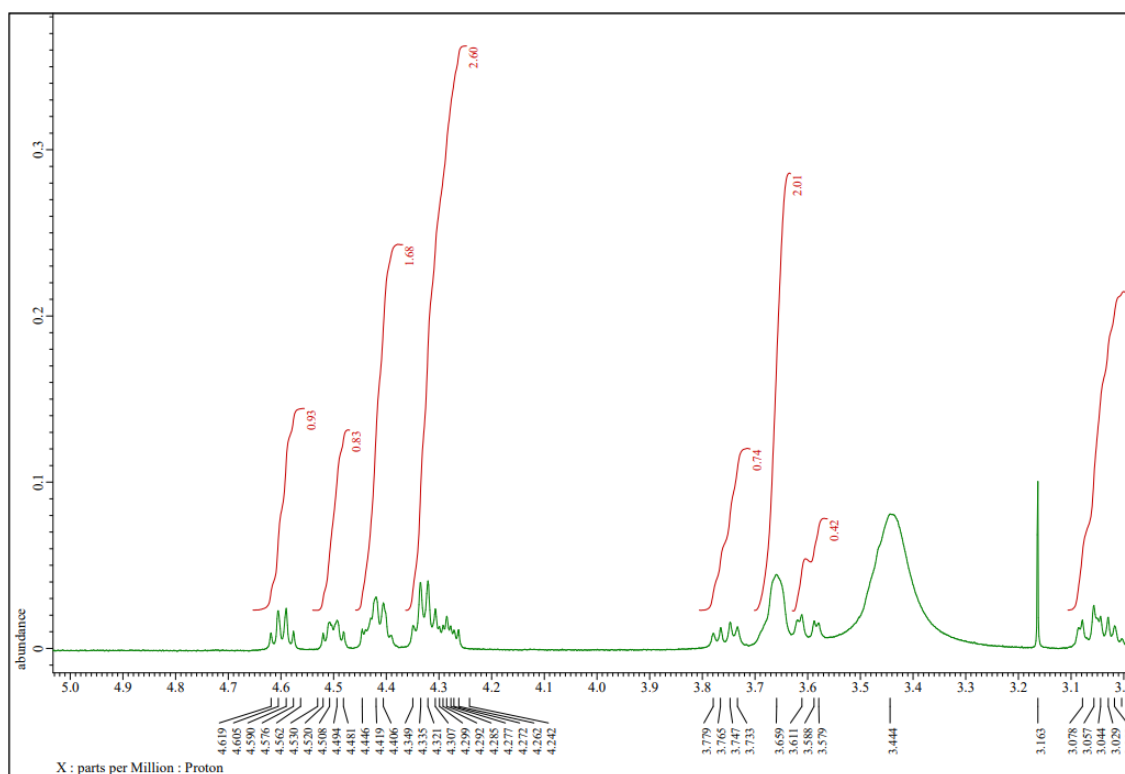

Cyclo-[L-LAP-D-Ser-D-Tyr-L- $\alpha$ Dab-Gly-Asn-Ser-Asn] (14)

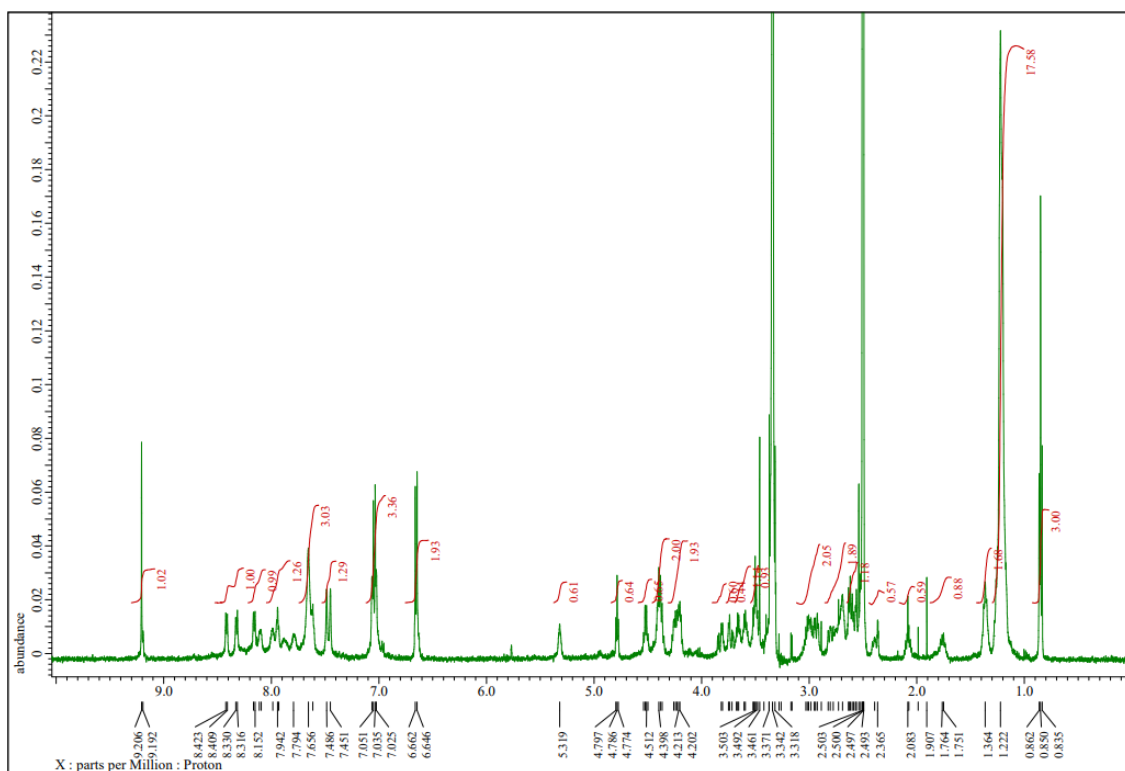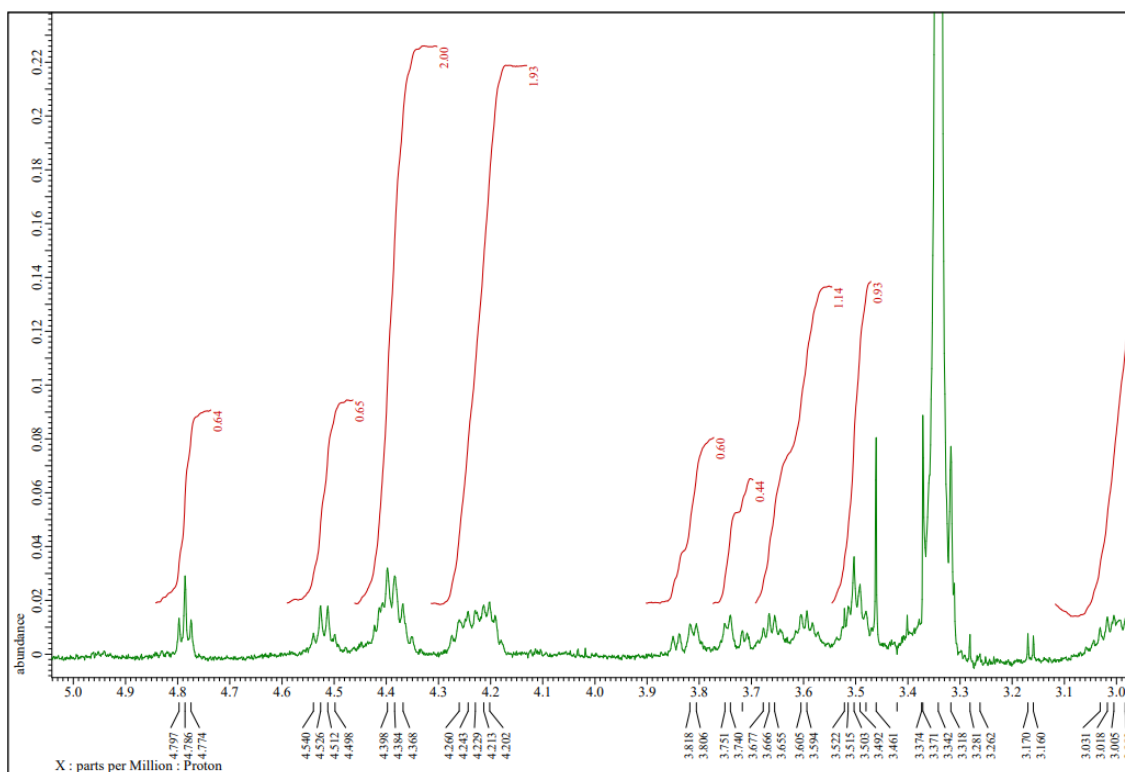

Cyclo-[D-LAP-D-Ser-D-Tyr-D- $\alpha$ Dab-Gly-Asn-Ser-Asn] (**15**)

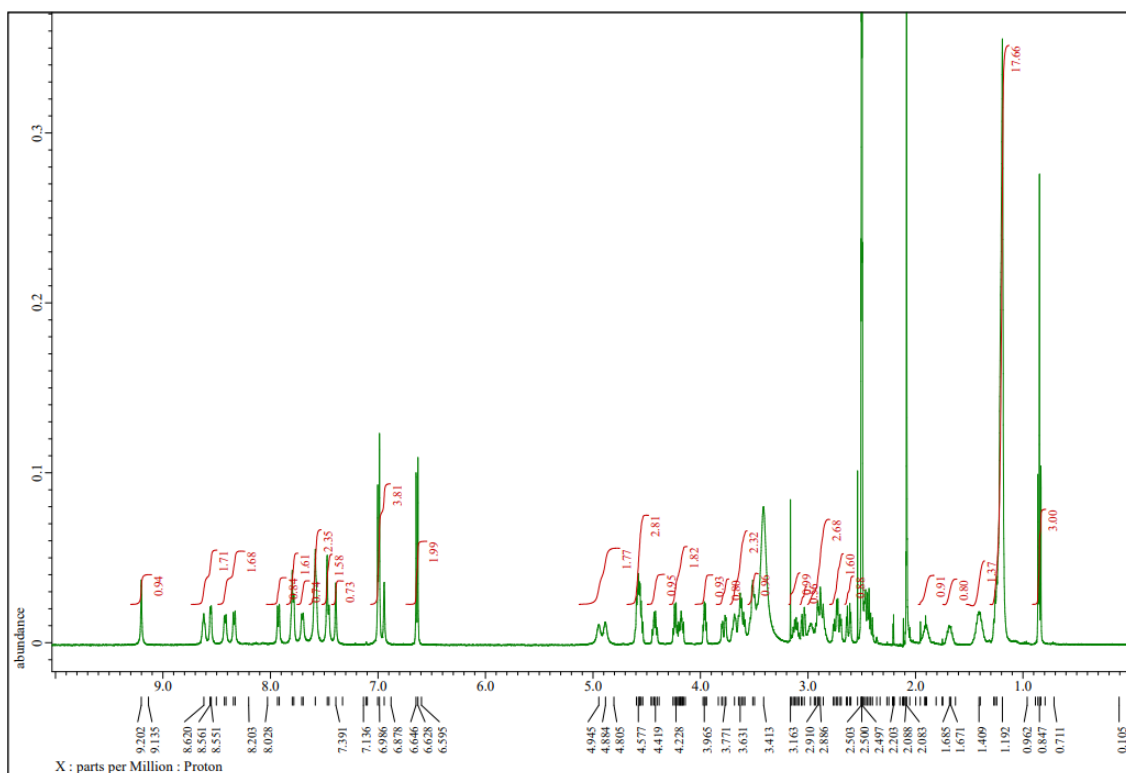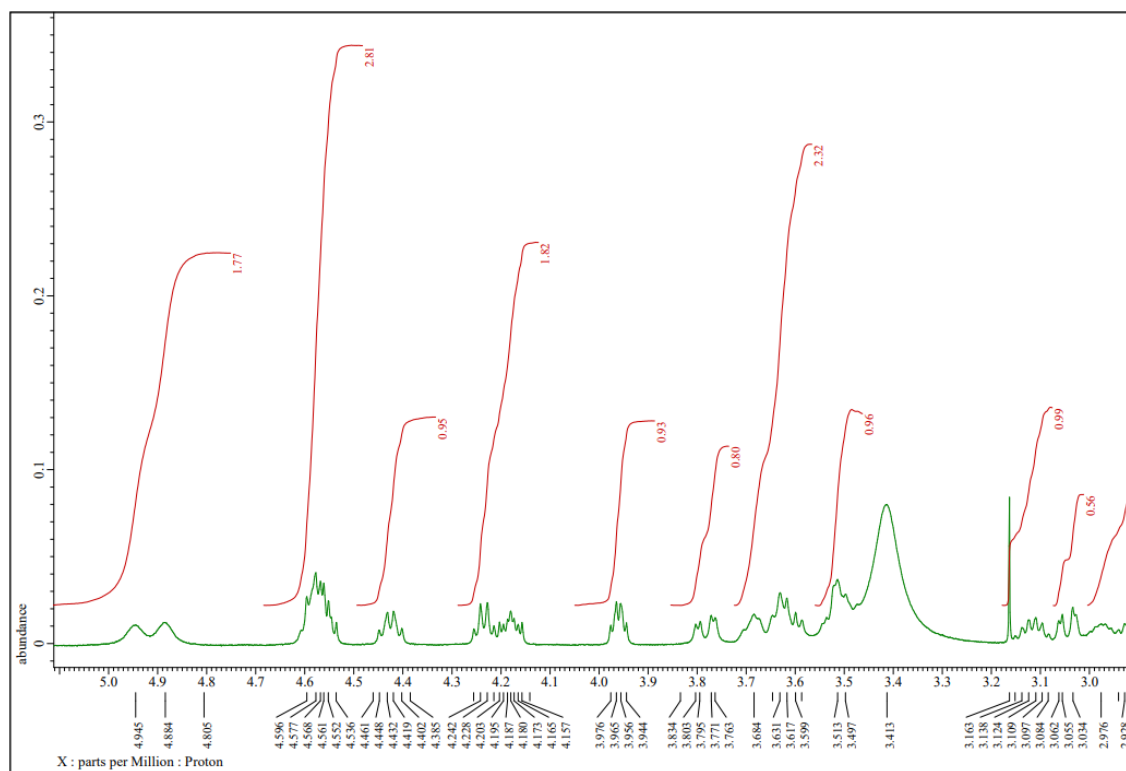



Cyclo-[D-LAP-D-Ser-D-Tyr-L- $\alpha$ Dab-Gly-Asn-Ser-Asn] (16)

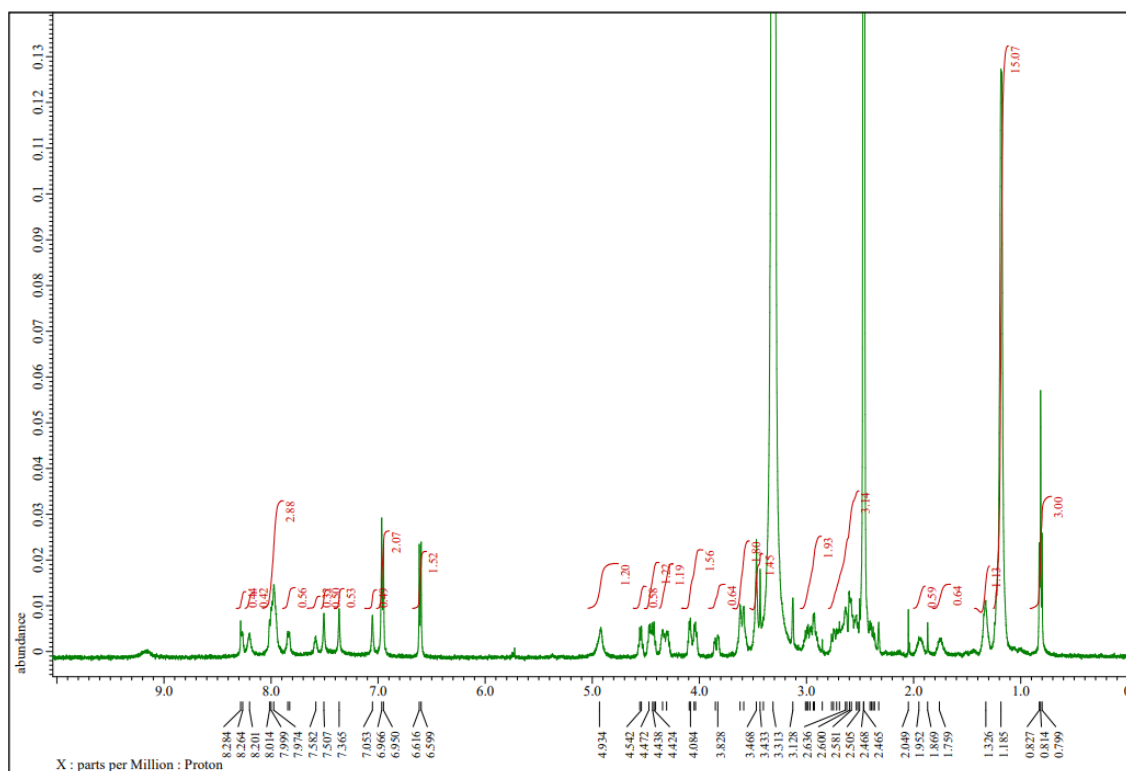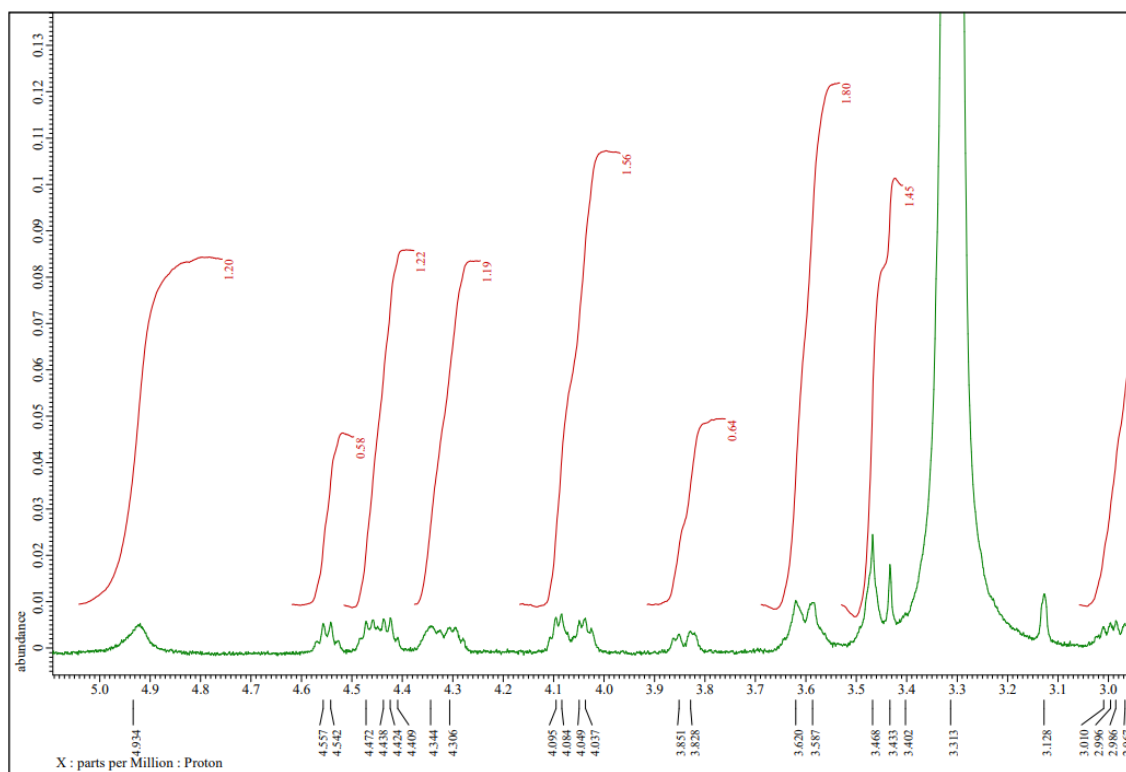

Cyclo-[L-LAP-D-Ser-D-Tyr-L- $\gamma$ Dab-Gly-Asn-Ser-Asn] (17)

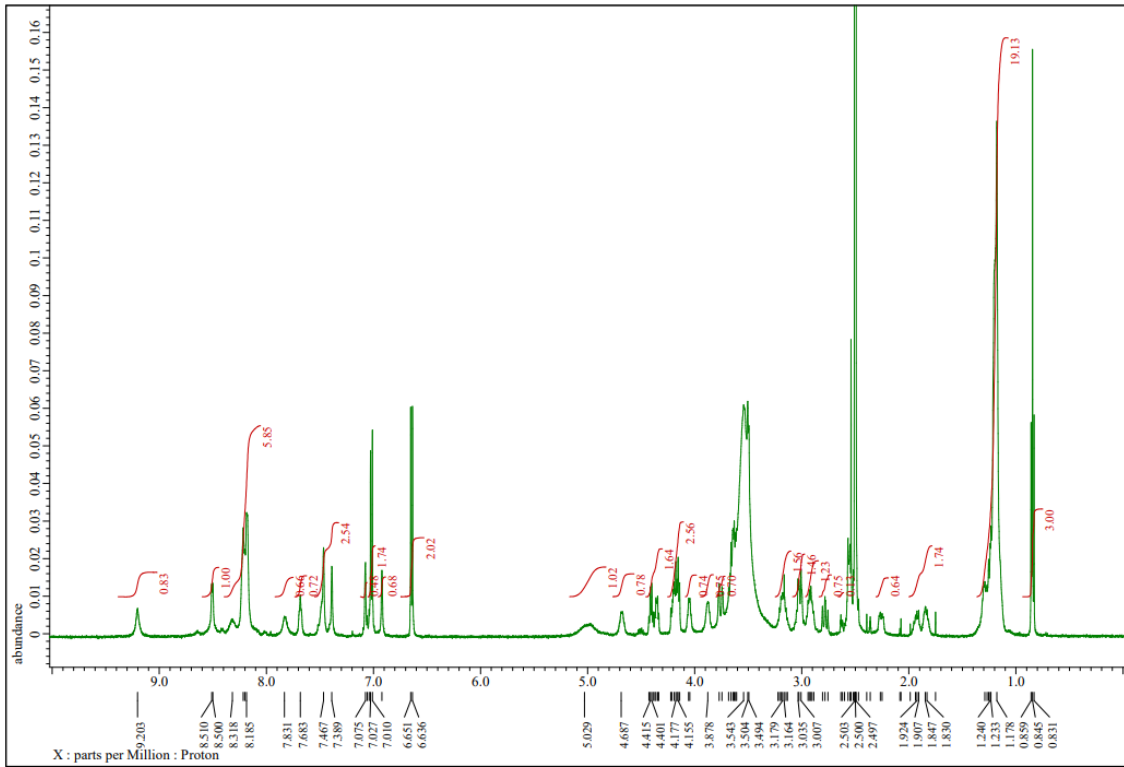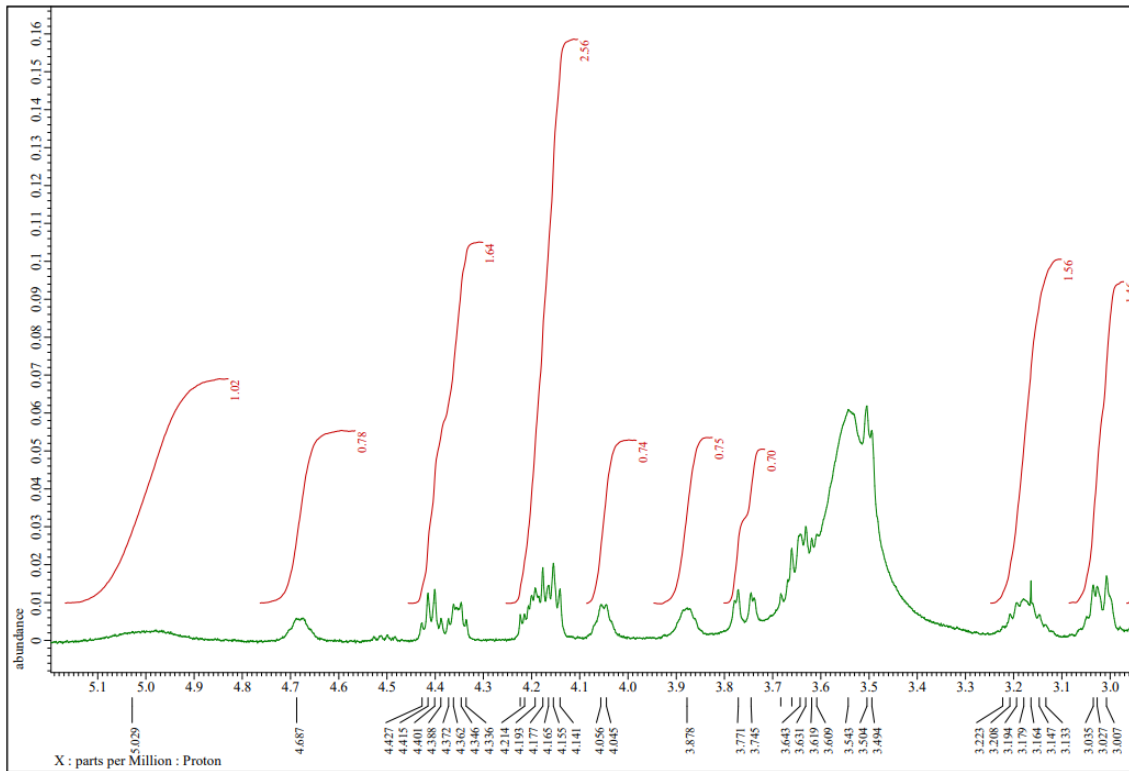

Cyclo-[D-LAP-D-Ser-D-Tyr-L- $\gamma$ Dab-Gly-Asn-Ser-Asn] (18)

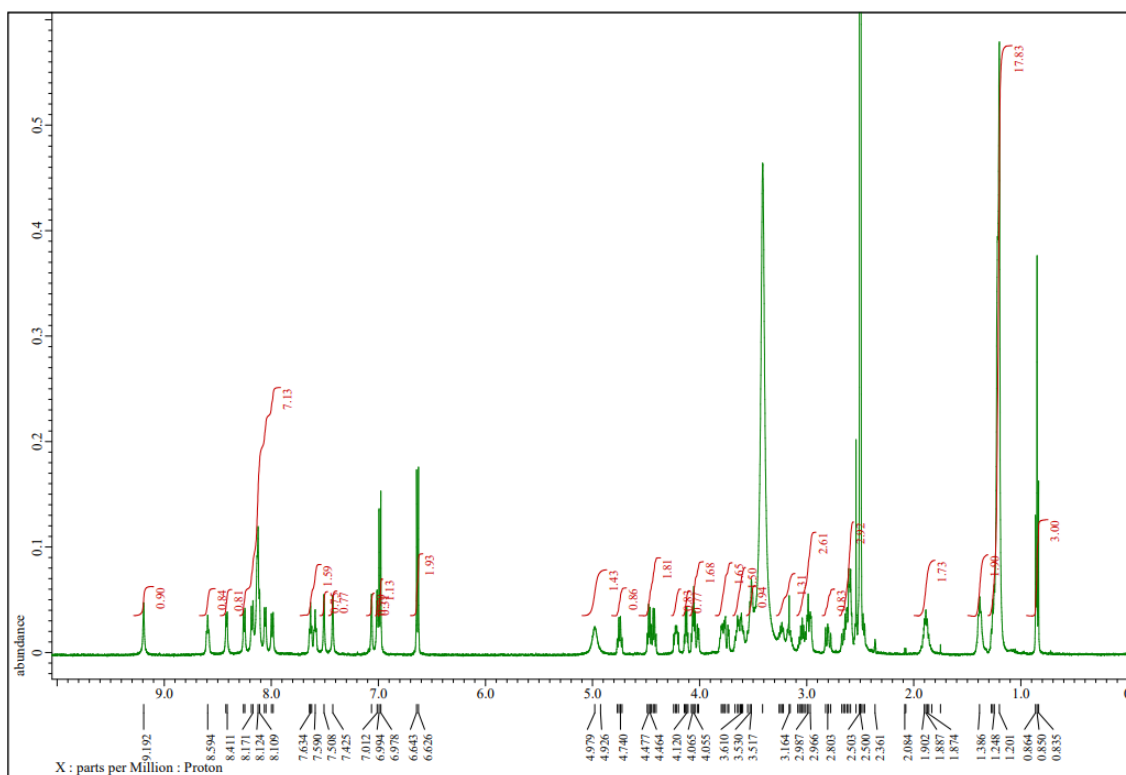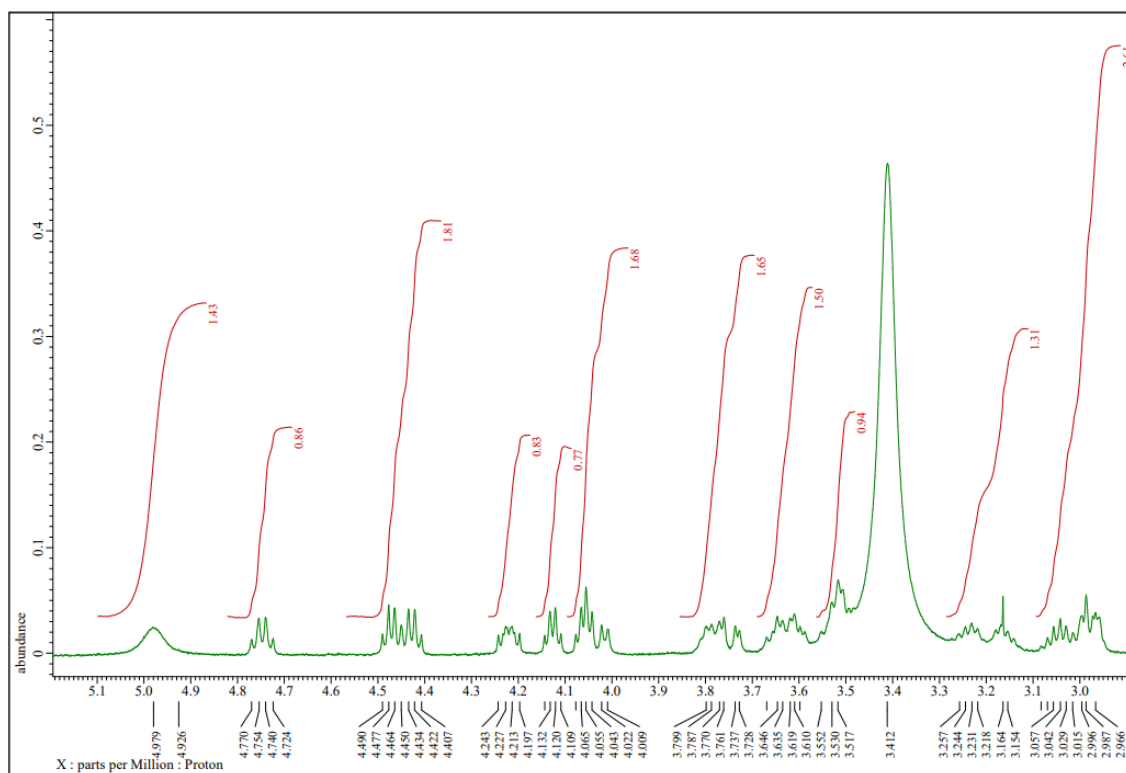

### 3. $^{13}\text{C}$ NMR spectra

#### L-Tyr-L- $\alpha$ Dab-Gly (**11a**)

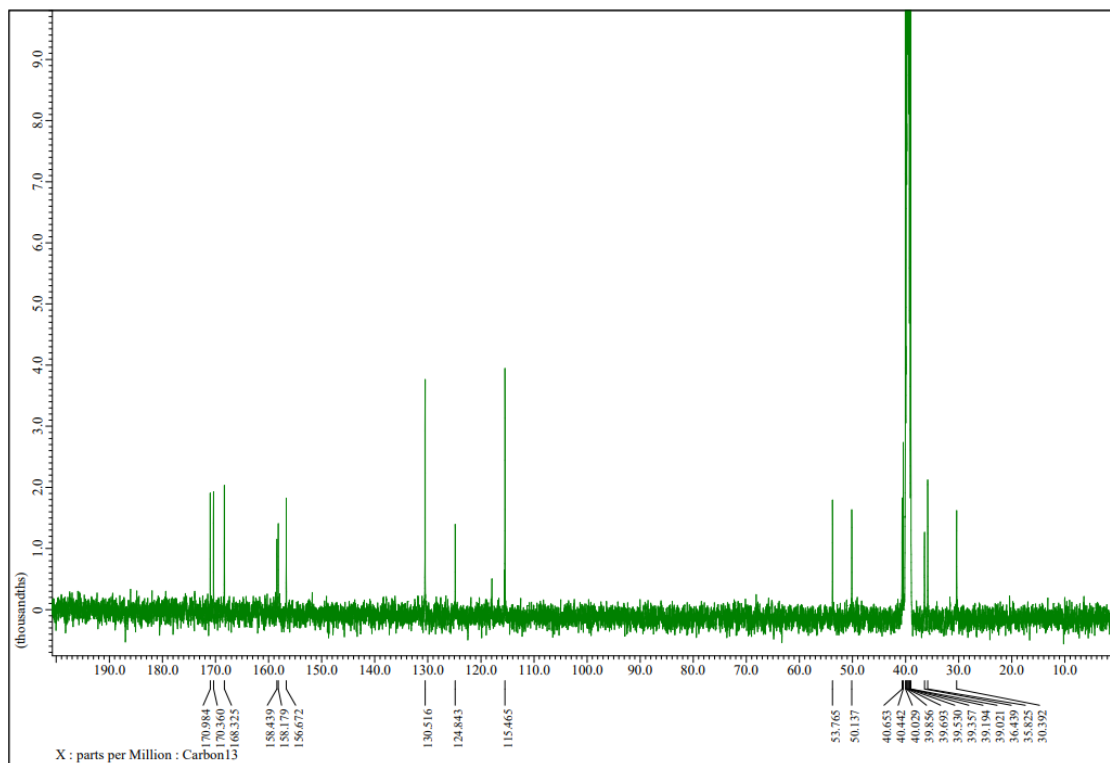

#### D-Tyr-L- $\alpha$ Dab-Gly (**11b**)

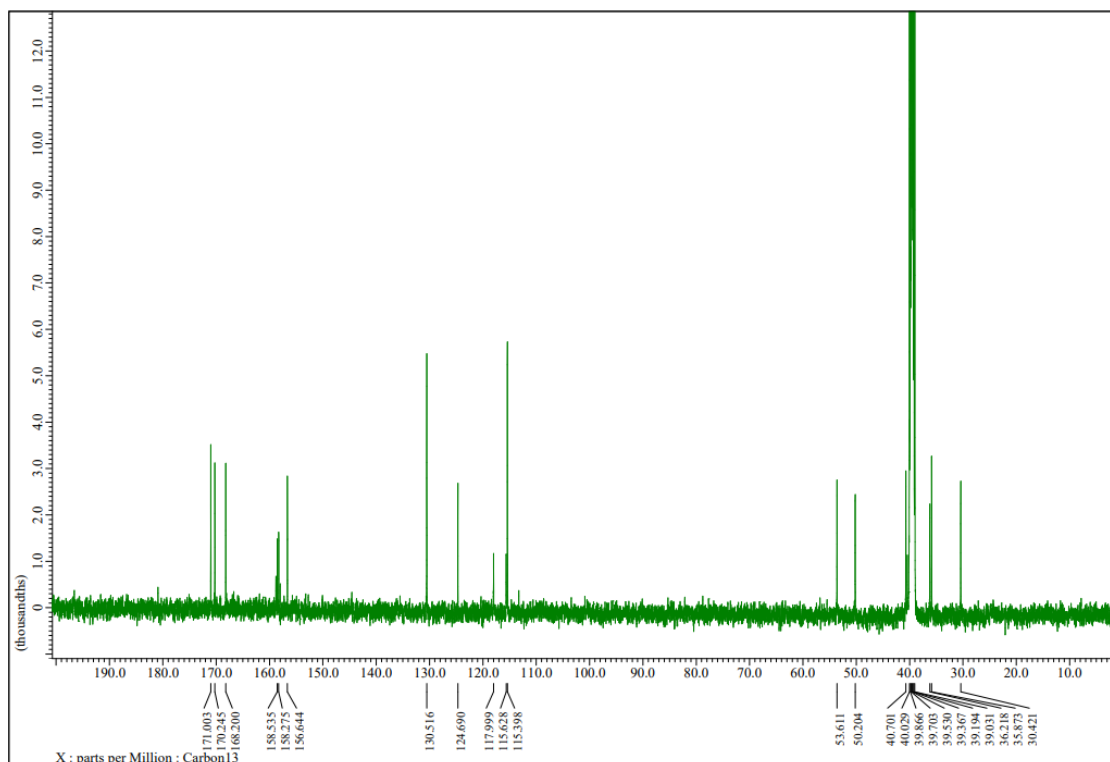

L-Tyr-L- $\gamma$ Dab-Gly (**12a**)

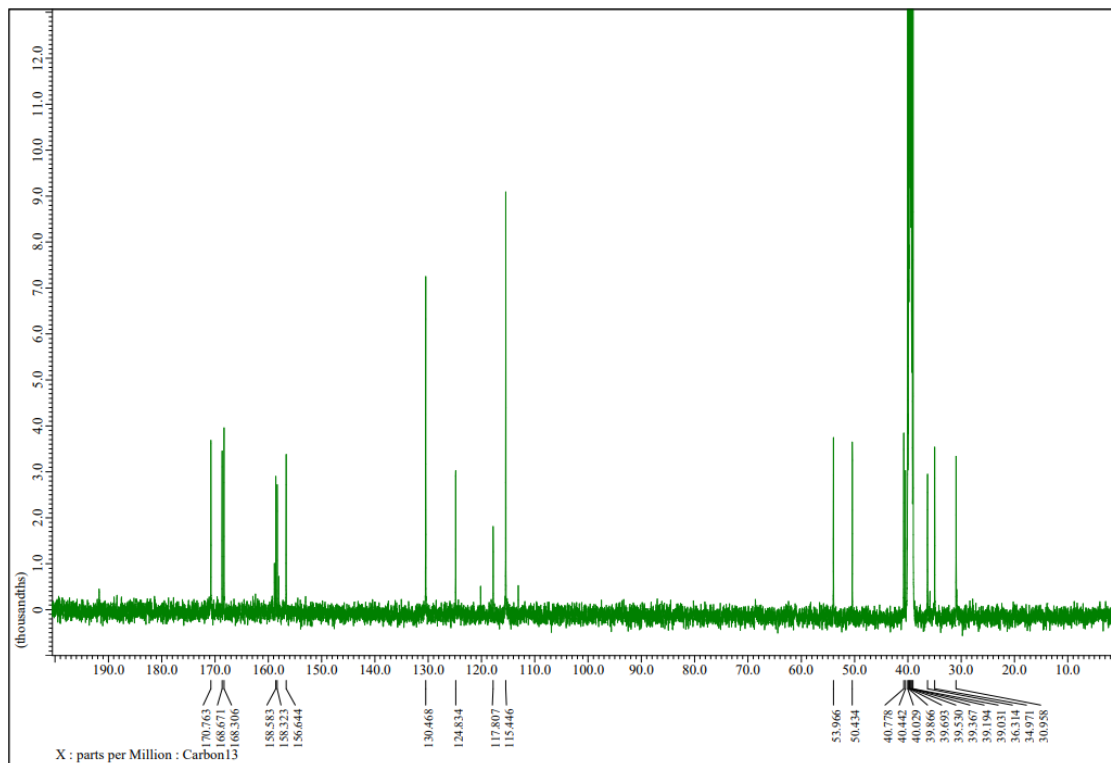

D-Tyr-L- $\gamma$ Dab-Gly (**12b**)

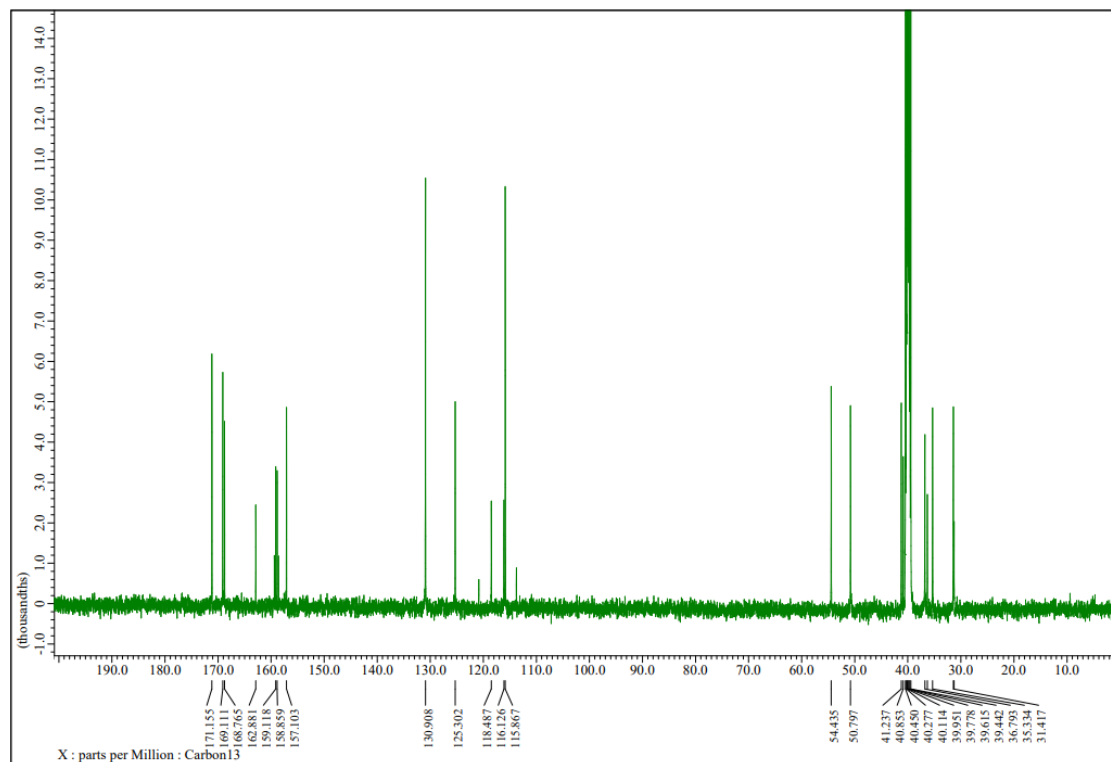

## IR spectra

### L-Tyr-L- $\alpha$ Dab-Gly (11a)

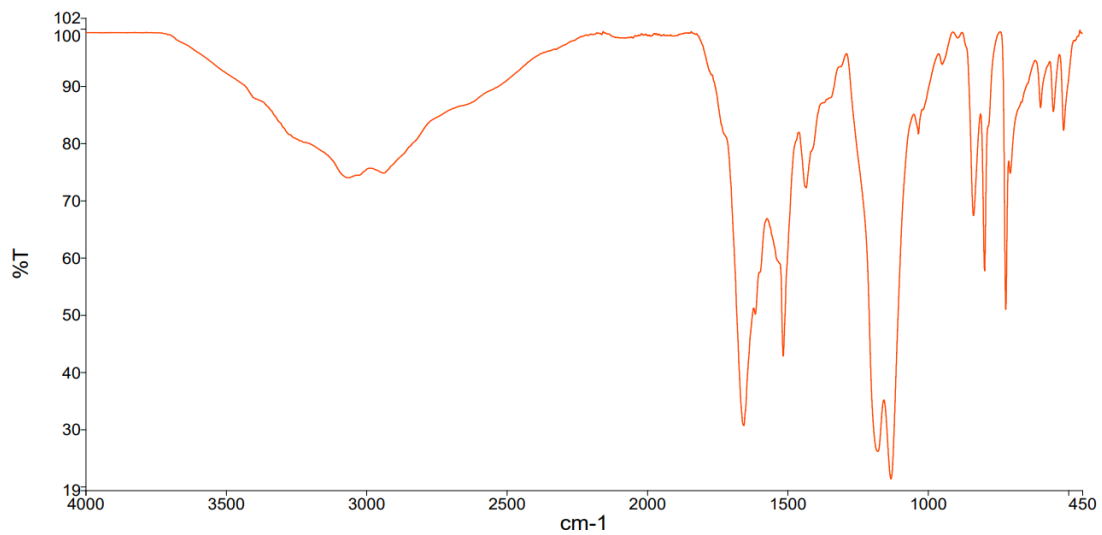

### D-Tyr-L- $\alpha$ Dab-Gly (11b)

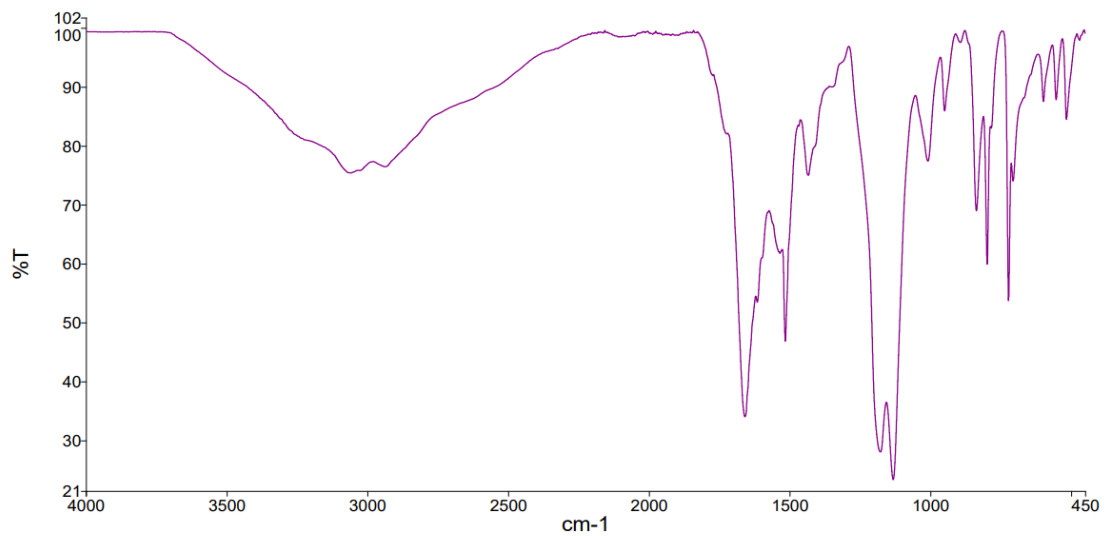

L-Tyr-L- $\gamma$ Dab-Gly (**12a**)

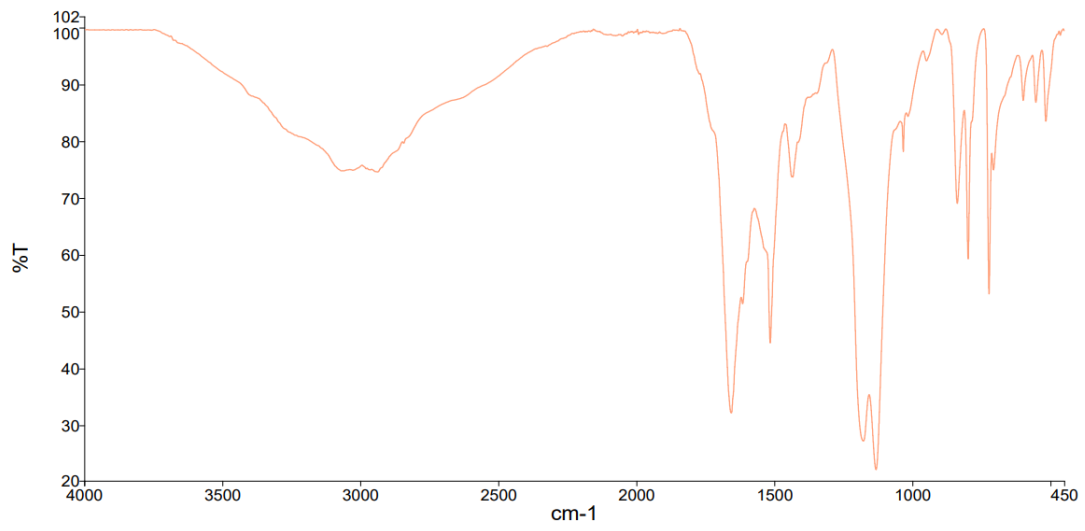

D-Tyr-L- $\gamma$ Dab-Gly (**12b**)

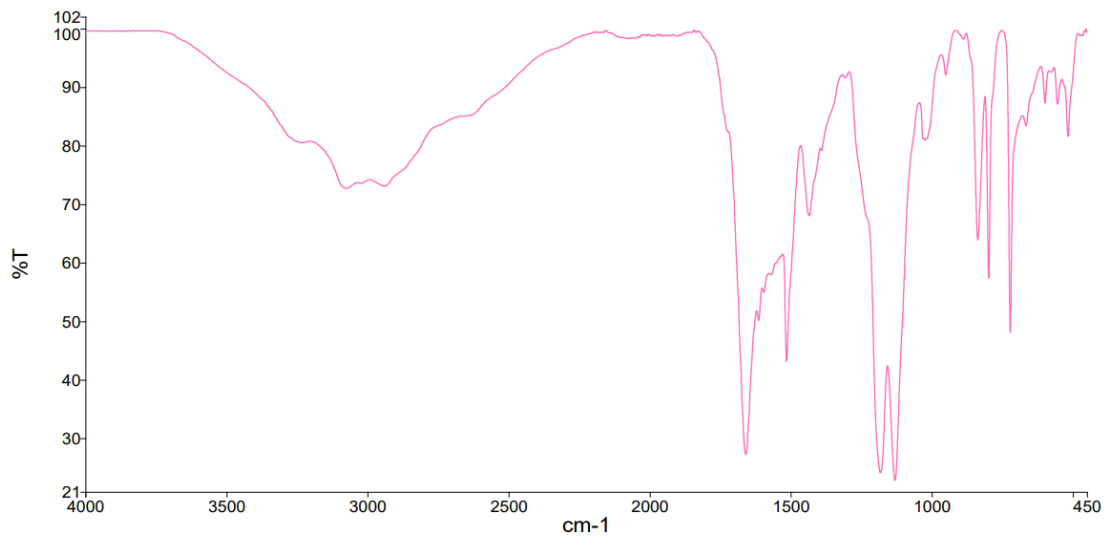

Supplement: d4ob00900b1.pdf [file d4ob00900b1.pdf]
